# Supplementary material for: Optimized sample selection for cost-efficient long-read population sequencing
Source: HighWire-hosted journal article supplement (doi:10.1101/gr.264879.120), 2021-04-02
Supplement: Supplemental_Tables.xlsx [file Supplemental_Tables.xlsx]

## Sheet: 1000 Genomes Info
sample	pop	super_pop	gender
HG00096	GBR	EUR	male
HG00097	GBR	EUR	female
HG00099	GBR	EUR	female
HG00100	GBR	EUR	female
HG00101	GBR	EUR	male
HG00102	GBR	EUR	female
HG00103	GBR	EUR	male
HG00105	GBR	EUR	male
HG00106	GBR	EUR	female
HG00107	GBR	EUR	male
HG00108	GBR	EUR	male
HG00109	GBR	EUR	male
HG00110	GBR	EUR	female
HG00111	GBR	EUR	female
HG00112	GBR	EUR	male
HG00113	GBR	EUR	male
HG00114	GBR	EUR	male
HG00115	GBR	EUR	male
HG00116	GBR	EUR	male
HG00117	GBR	EUR	male
HG00118	GBR	EUR	female
HG00119	GBR	EUR	male
HG00120	GBR	EUR	female
HG00121	GBR	EUR	female
HG00122	GBR	EUR	female
HG00123	GBR	EUR	female
HG00125	GBR	EUR	female
HG00126	GBR	EUR	male
HG00127	GBR	EUR	female
HG00128	GBR	EUR	female
HG00129	GBR	EUR	male
HG00130	GBR	EUR	female
HG00131	GBR	EUR	male
HG00132	GBR	EUR	female
HG00133	GBR	EUR	female
HG00136	GBR	EUR	male
HG00137	GBR	EUR	female
HG00138	GBR	EUR	male
HG00139	GBR	EUR	male
HG00140	GBR	EUR	male
HG00141	GBR	EUR	male
HG00142	GBR	EUR	male
HG00143	GBR	EUR	male
HG00145	GBR	EUR	male
HG00146	GBR	EUR	female
HG00148	GBR	EUR	male
HG00149	GBR	EUR	male
HG00150	GBR	EUR	female
HG00151	GBR	EUR	male
HG00154	GBR	EUR	female
HG00155	GBR	EUR	male
HG00157	GBR	EUR	male
HG00158	GBR	EUR	female
HG00159	GBR	EUR	male
HG00160	GBR	EUR	male
HG00171	FIN	EUR	female
HG00173	FIN	EUR	female
HG00174	FIN	EUR	female
HG00176	FIN	EUR	female
HG00177	FIN	EUR	female
HG00178	FIN	EUR	female
HG00179	FIN	EUR	female
HG00180	FIN	EUR	female
HG00181	FIN	EUR	male
HG00182	FIN	EUR	male
HG00183	FIN	EUR	male
HG00185	FIN	EUR	male
HG00186	FIN	EUR	male
HG00187	FIN	EUR	male
HG00188	FIN	EUR	male
HG00189	FIN	EUR	male
HG00190	FIN	EUR	male
HG00231	GBR	EUR	female
HG00232	GBR	EUR	female
HG00233	GBR	EUR	female
HG00234	GBR	EUR	male
HG00235	GBR	EUR	female
HG00236	GBR	EUR	female
HG00237	GBR	EUR	female
HG00238	GBR	EUR	female
HG00239	GBR	EUR	female
HG00240	GBR	EUR	female
HG00242	GBR	EUR	male
HG00243	GBR	EUR	male
HG00244	GBR	EUR	male
HG00245	GBR	EUR	female
HG00246	GBR	EUR	male
HG00250	GBR	EUR	female
HG00251	GBR	EUR	male
HG00252	GBR	EUR	male
HG00253	GBR	EUR	female
HG00254	GBR	EUR	female
HG00255	GBR	EUR	female
HG00256	GBR	EUR	male
HG00257	GBR	EUR	female
HG00258	GBR	EUR	female
HG00259	GBR	EUR	female
HG00260	GBR	EUR	male
HG00261	GBR	EUR	female
HG00262	GBR	EUR	female
HG00263	GBR	EUR	female
HG00264	GBR	EUR	male
HG00265	GBR	EUR	male
HG00266	FIN	EUR	female
HG00267	FIN	EUR	male
HG00268	FIN	EUR	female
HG00269	FIN	EUR	female
HG00271	FIN	EUR	male
HG00272	FIN	EUR	female
HG00273	FIN	EUR	male
HG00274	FIN	EUR	female
HG00275	FIN	EUR	female
HG00276	FIN	EUR	female
HG00277	FIN	EUR	male
HG00278	FIN	EUR	male
HG00280	FIN	EUR	male
HG00281	FIN	EUR	female
HG00282	FIN	EUR	female
HG00284	FIN	EUR	male
HG00285	FIN	EUR	female
HG00288	FIN	EUR	female
HG00290	FIN	EUR	male
HG00304	FIN	EUR	female
HG00306	FIN	EUR	female
HG00308	FIN	EUR	male
HG00309	FIN	EUR	female
HG00310	FIN	EUR	male
HG00311	FIN	EUR	male
HG00313	FIN	EUR	female
HG00315	FIN	EUR	female
HG00318	FIN	EUR	female
HG00319	FIN	EUR	female
HG00320	FIN	EUR	female
HG00321	FIN	EUR	male
HG00323	FIN	EUR	female
HG00324	FIN	EUR	female
HG00325	FIN	EUR	male
HG00326	FIN	EUR	female
HG00327	FIN	EUR	female
HG00328	FIN	EUR	female
HG00329	FIN	EUR	male
HG00330	FIN	EUR	female
HG00331	FIN	EUR	female
HG00332	FIN	EUR	female
HG00334	FIN	EUR	female
HG00335	FIN	EUR	male
HG00336	FIN	EUR	male
HG00337	FIN	EUR	female
HG00338	FIN	EUR	male
HG00339	FIN	EUR	female
HG00341	FIN	EUR	male
HG00342	FIN	EUR	male
HG00343	FIN	EUR	female
HG00344	FIN	EUR	female
HG00345	FIN	EUR	male
HG00346	FIN	EUR	female
HG00349	FIN	EUR	female
HG00350	FIN	EUR	female
HG00351	FIN	EUR	male
HG00353	FIN	EUR	female
HG00355	FIN	EUR	female
HG00356	FIN	EUR	female
HG00357	FIN	EUR	female
HG00358	FIN	EUR	male
HG00360	FIN	EUR	male
HG00361	FIN	EUR	female
HG00362	FIN	EUR	female
HG00364	FIN	EUR	female
HG00365	FIN	EUR	female
HG00366	FIN	EUR	male
HG00367	FIN	EUR	female
HG00368	FIN	EUR	female
HG00369	FIN	EUR	male
HG00371	FIN	EUR	male
HG00372	FIN	EUR	male
HG00373	FIN	EUR	female
HG00375	FIN	EUR	male
HG00376	FIN	EUR	female
HG00378	FIN	EUR	female
HG00379	FIN	EUR	female
HG00380	FIN	EUR	female
HG00381	FIN	EUR	female
HG00382	FIN	EUR	male
HG00383	FIN	EUR	female
HG00384	FIN	EUR	female
HG00403	CHS	EAS	male
HG00404	CHS	EAS	female
HG00406	CHS	EAS	male
HG00407	CHS	EAS	female
HG00409	CHS	EAS	male
HG00410	CHS	EAS	female
HG00419	CHS	EAS	female
HG00421	CHS	EAS	male
HG00422	CHS	EAS	female
HG00428	CHS	EAS	female
HG00436	CHS	EAS	male
HG00437	CHS	EAS	female
HG00442	CHS	EAS	male
HG00443	CHS	EAS	female
HG00445	CHS	EAS	male
HG00446	CHS	EAS	female
HG00448	CHS	EAS	male
HG00449	CHS	EAS	female
HG00451	CHS	EAS	male
HG00452	CHS	EAS	female
HG00457	CHS	EAS	male
HG00458	CHS	EAS	female
HG00463	CHS	EAS	male
HG00464	CHS	EAS	female
HG00472	CHS	EAS	male
HG00473	CHS	EAS	female
HG00475	CHS	EAS	male
HG00476	CHS	EAS	female
HG00478	CHS	EAS	male
HG00479	CHS	EAS	female
HG00500	CHS	EAS	male
HG00513	CHS	EAS	female
HG00524	CHS	EAS	male
HG00525	CHS	EAS	female
HG00530	CHS	EAS	male
HG00531	CHS	EAS	female
HG00533	CHS	EAS	male
HG00534	CHS	EAS	female
HG00536	CHS	EAS	male
HG00537	CHS	EAS	female
HG00542	CHS	EAS	male
HG00543	CHS	EAS	female
HG00551	PUR	AMR	female
HG00553	PUR	AMR	male
HG00554	PUR	AMR	female
HG00556	CHS	EAS	male
HG00557	CHS	EAS	female
HG00559	CHS	EAS	male
HG00560	CHS	EAS	female
HG00565	CHS	EAS	male
HG00566	CHS	EAS	female
HG00580	CHS	EAS	male
HG00581	CHS	EAS	female
HG00583	CHS	EAS	male
HG00584	CHS	EAS	female
HG00589	CHS	EAS	male
HG00590	CHS	EAS	female
HG00592	CHS	EAS	male
HG00593	CHS	EAS	female
HG00595	CHS	EAS	male
HG00596	CHS	EAS	female
HG00598	CHS	EAS	male
HG00599	CHS	EAS	female
HG00607	CHS	EAS	male
HG00608	CHS	EAS	female
HG00610	CHS	EAS	male
HG00611	CHS	EAS	female
HG00613	CHS	EAS	male
HG00614	CHS	EAS	female
HG00619	CHS	EAS	male
HG00620	CHS	EAS	female
HG00622	CHS	EAS	male
HG00623	CHS	EAS	female
HG00625	CHS	EAS	male
HG00626	CHS	EAS	female
HG00628	CHS	EAS	male
HG00629	CHS	EAS	female
HG00631	CHS	EAS	male
HG00632	CHS	EAS	female
HG00634	CHS	EAS	male
HG00637	PUR	AMR	male
HG00638	PUR	AMR	female
HG00640	PUR	AMR	male
HG00641	PUR	AMR	female
HG00650	CHS	EAS	male
HG00651	CHS	EAS	female
HG00653	CHS	EAS	male
HG00654	CHS	EAS	female
HG00656	CHS	EAS	male
HG00657	CHS	EAS	female
HG00662	CHS	EAS	male
HG00663	CHS	EAS	female
HG00671	CHS	EAS	male
HG00672	CHS	EAS	female
HG00674	CHS	EAS	male
HG00675	CHS	EAS	female
HG00683	CHS	EAS	male
HG00684	CHS	EAS	female
HG00689	CHS	EAS	male
HG00690	CHS	EAS	female
HG00692	CHS	EAS	male
HG00693	CHS	EAS	female
HG00698	CHS	EAS	male
HG00699	CHS	EAS	female
HG00701	CHS	EAS	male
HG00704	CHS	EAS	male
HG00705	CHS	EAS	female
HG00707	CHS	EAS	male
HG00708	CHS	EAS	female
HG00717	CHS	EAS	female
HG00728	CHS	EAS	male
HG00729	CHS	EAS	female
HG00731	PUR	AMR	male
HG00732	PUR	AMR	female
HG00734	PUR	AMR	female
HG00736	PUR	AMR	male
HG00737	PUR	AMR	female
HG00739	PUR	AMR	male
HG00740	PUR	AMR	female
HG00742	PUR	AMR	male
HG00743	PUR	AMR	female
HG00759	CDX	EAS	female
HG00766	CDX	EAS	female
HG00844	CDX	EAS	male
HG00851	CDX	EAS	female
HG00864	CDX	EAS	female
HG00867	CDX	EAS	female
HG00879	CDX	EAS	female
HG00881	CDX	EAS	male
HG00956	CDX	EAS	female
HG00978	CDX	EAS	female
HG00982	CDX	EAS	male
HG01028	CDX	EAS	male
HG01029	CDX	EAS	female
HG01031	CDX	EAS	male
HG01046	CDX	EAS	female
HG01047	PUR	AMR	male
HG01048	PUR	AMR	male
HG01049	PUR	AMR	female
HG01051	PUR	AMR	male
HG01052	PUR	AMR	female
HG01054	PUR	AMR	male
HG01055	PUR	AMR	female
HG01058	PUR	AMR	female
HG01060	PUR	AMR	male
HG01061	PUR	AMR	female
HG01063	PUR	AMR	male
HG01064	PUR	AMR	female
HG01066	PUR	AMR	male
HG01067	PUR	AMR	female
HG01069	PUR	AMR	male
HG01070	PUR	AMR	female
HG01072	PUR	AMR	male
HG01073	PUR	AMR	female
HG01075	PUR	AMR	male
HG01077	PUR	AMR	female
HG01079	PUR	AMR	male
HG01080	PUR	AMR	female
HG01082	PUR	AMR	male
HG01083	PUR	AMR	female
HG01085	PUR	AMR	male
HG01086	PUR	AMR	female
HG01088	PUR	AMR	male
HG01089	PUR	AMR	female
HG01092	PUR	AMR	female
HG01094	PUR	AMR	male
HG01095	PUR	AMR	female
HG01097	PUR	AMR	male
HG01098	PUR	AMR	female
HG01101	PUR	AMR	male
HG01102	PUR	AMR	female
HG01104	PUR	AMR	male
HG01105	PUR	AMR	female
HG01107	PUR	AMR	male
HG01108	PUR	AMR	female
HG01110	PUR	AMR	male
HG01111	PUR	AMR	female
HG01112	CLM	AMR	male
HG01113	CLM	AMR	female
HG01119	CLM	AMR	female
HG01121	CLM	AMR	male
HG01122	CLM	AMR	female
HG01124	CLM	AMR	male
HG01125	CLM	AMR	female
HG01130	CLM	AMR	male
HG01131	CLM	AMR	female
HG01133	CLM	AMR	male
HG01134	CLM	AMR	female
HG01136	CLM	AMR	male
HG01137	CLM	AMR	female
HG01139	CLM	AMR	male
HG01140	CLM	AMR	female
HG01142	CLM	AMR	male
HG01148	CLM	AMR	male
HG01149	CLM	AMR	female
HG01161	PUR	AMR	male
HG01162	PUR	AMR	female
HG01164	PUR	AMR	male
HG01167	PUR	AMR	male
HG01168	PUR	AMR	female
HG01170	PUR	AMR	male
HG01171	PUR	AMR	female
HG01173	PUR	AMR	male
HG01174	PUR	AMR	female
HG01176	PUR	AMR	male
HG01177	PUR	AMR	female
HG01182	PUR	AMR	male
HG01183	PUR	AMR	female
HG01187	PUR	AMR	male
HG01188	PUR	AMR	female
HG01190	PUR	AMR	male
HG01191	PUR	AMR	female
HG01197	PUR	AMR	male
HG01198	PUR	AMR	female
HG01200	PUR	AMR	male
HG01204	PUR	AMR	male
HG01205	PUR	AMR	female
HG01241	PUR	AMR	male
HG01242	PUR	AMR	female
HG01247	PUR	AMR	male
HG01248	PUR	AMR	female
HG01250	CLM	AMR	male
HG01251	CLM	AMR	female
HG01253	CLM	AMR	male
HG01254	CLM	AMR	female
HG01256	CLM	AMR	male
HG01257	CLM	AMR	female
HG01259	CLM	AMR	male
HG01260	CLM	AMR	female
HG01269	CLM	AMR	female
HG01271	CLM	AMR	male
HG01272	CLM	AMR	female
HG01275	CLM	AMR	female
HG01277	CLM	AMR	male
HG01280	CLM	AMR	male
HG01281	CLM	AMR	female
HG01284	CLM	AMR	female
HG01286	PUR	AMR	male
HG01302	PUR	AMR	male
HG01303	PUR	AMR	female
HG01305	PUR	AMR	male
HG01308	PUR	AMR	male
HG01311	PUR	AMR	male
HG01312	PUR	AMR	female
HG01323	PUR	AMR	female
HG01325	PUR	AMR	male
HG01326	PUR	AMR	female
HG01334	GBR	EUR	male
HG01341	CLM	AMR	male
HG01342	CLM	AMR	female
HG01344	CLM	AMR	male
HG01345	CLM	AMR	female
HG01348	CLM	AMR	female
HG01350	CLM	AMR	male
HG01351	CLM	AMR	female
HG01353	CLM	AMR	male
HG01354	CLM	AMR	female
HG01356	CLM	AMR	male
HG01357	CLM	AMR	female
HG01359	CLM	AMR	male
HG01360	CLM	AMR	female
HG01362	CLM	AMR	male
HG01363	CLM	AMR	female
HG01365	CLM	AMR	male
HG01366	CLM	AMR	female
HG01369	CLM	AMR	female
HG01372	CLM	AMR	female
HG01374	CLM	AMR	male
HG01375	CLM	AMR	female
HG01377	CLM	AMR	male
HG01378	CLM	AMR	female
HG01383	CLM	AMR	male
HG01384	CLM	AMR	female
HG01389	CLM	AMR	male
HG01390	CLM	AMR	female
HG01392	PUR	AMR	male
HG01393	PUR	AMR	female
HG01395	PUR	AMR	male
HG01396	PUR	AMR	female
HG01398	PUR	AMR	male
HG01402	PUR	AMR	male
HG01403	PUR	AMR	female
HG01405	PUR	AMR	male
HG01412	PUR	AMR	male
HG01413	PUR	AMR	male
HG01414	PUR	AMR	female
HG01431	CLM	AMR	male
HG01432	CLM	AMR	female
HG01435	CLM	AMR	female
HG01437	CLM	AMR	male
HG01438	CLM	AMR	female
HG01440	CLM	AMR	male
HG01441	CLM	AMR	female
HG01443	CLM	AMR	male
HG01444	CLM	AMR	female
HG01447	CLM	AMR	female
HG01455	CLM	AMR	male
HG01456	CLM	AMR	female
HG01459	CLM	AMR	female
HG01461	CLM	AMR	male
HG01462	CLM	AMR	female
HG01464	CLM	AMR	male
HG01465	CLM	AMR	female
HG01468	CLM	AMR	female
HG01474	CLM	AMR	female
HG01479	CLM	AMR	male
HG01485	CLM	AMR	male
HG01486	CLM	AMR	female
HG01488	CLM	AMR	male
HG01489	CLM	AMR	female
HG01491	CLM	AMR	male
HG01492	CLM	AMR	female
HG01494	CLM	AMR	male
HG01495	CLM	AMR	female
HG01497	CLM	AMR	male
HG01498	CLM	AMR	female
HG01500	IBS	EUR	male
HG01501	IBS	EUR	female
HG01503	IBS	EUR	male
HG01504	IBS	EUR	female
HG01506	IBS	EUR	male
HG01507	IBS	EUR	female
HG01509	IBS	EUR	male
HG01510	IBS	EUR	female
HG01512	IBS	EUR	male
HG01513	IBS	EUR	female
HG01515	IBS	EUR	male
HG01516	IBS	EUR	female
HG01518	IBS	EUR	male
HG01519	IBS	EUR	female
HG01521	IBS	EUR	male
HG01522	IBS	EUR	female
HG01524	IBS	EUR	male
HG01525	IBS	EUR	female
HG01527	IBS	EUR	male
HG01528	IBS	EUR	female
HG01530	IBS	EUR	male
HG01531	IBS	EUR	female
HG01536	IBS	EUR	male
HG01537	IBS	EUR	female
HG01550	CLM	AMR	male
HG01551	CLM	AMR	female
HG01556	CLM	AMR	male
HG01565	PEL	AMR	male
HG01566	PEL	AMR	female
HG01571	PEL	AMR	male
HG01572	PEL	AMR	female
HG01577	PEL	AMR	male
HG01578	PEL	AMR	female
HG01583	PJL	SAS	male
HG01586	PJL	SAS	male
HG01589	PJL	SAS	male
HG01593	PJL	SAS	female
HG01595	KHV	EAS	female
HG01596	KHV	EAS	male
HG01597	KHV	EAS	female
HG01598	KHV	EAS	female
HG01599	KHV	EAS	female
HG01600	KHV	EAS	female
HG01602	IBS	EUR	female
HG01603	IBS	EUR	male
HG01605	IBS	EUR	female
HG01606	IBS	EUR	male
HG01607	IBS	EUR	female
HG01608	IBS	EUR	male
HG01610	IBS	EUR	male
HG01612	IBS	EUR	female
HG01613	IBS	EUR	female
HG01615	IBS	EUR	male
HG01617	IBS	EUR	male
HG01618	IBS	EUR	female
HG01619	IBS	EUR	male
HG01620	IBS	EUR	female
HG01623	IBS	EUR	female
HG01624	IBS	EUR	male
HG01625	IBS	EUR	male
HG01626	IBS	EUR	female
HG01628	IBS	EUR	female
HG01630	IBS	EUR	male
HG01631	IBS	EUR	male
HG01632	IBS	EUR	female
HG01668	IBS	EUR	female
HG01669	IBS	EUR	male
HG01670	IBS	EUR	female
HG01672	IBS	EUR	male
HG01673	IBS	EUR	female
HG01675	IBS	EUR	male
HG01676	IBS	EUR	female
HG01678	IBS	EUR	male
HG01679	IBS	EUR	female
HG01680	IBS	EUR	male
HG01682	IBS	EUR	male
HG01684	IBS	EUR	female
HG01685	IBS	EUR	female
HG01686	IBS	EUR	male
HG01694	IBS	EUR	male
HG01695	IBS	EUR	female
HG01697	IBS	EUR	female
HG01699	IBS	EUR	male
HG01700	IBS	EUR	male
HG01702	IBS	EUR	female
HG01704	IBS	EUR	female
HG01705	IBS	EUR	male
HG01707	IBS	EUR	female
HG01708	IBS	EUR	male
HG01709	IBS	EUR	male
HG01710	IBS	EUR	female
HG01746	IBS	EUR	female
HG01747	IBS	EUR	male
HG01756	IBS	EUR	male
HG01757	IBS	EUR	female
HG01761	IBS	EUR	male
HG01762	IBS	EUR	female
HG01765	IBS	EUR	male
HG01766	IBS	EUR	female
HG01767	IBS	EUR	male
HG01768	IBS	EUR	female
HG01770	IBS	EUR	female
HG01771	IBS	EUR	male
HG01773	IBS	EUR	female
HG01775	IBS	EUR	male
HG01776	IBS	EUR	female
HG01777	IBS	EUR	male
HG01779	IBS	EUR	female
HG01781	IBS	EUR	male
HG01783	IBS	EUR	male
HG01784	IBS	EUR	female
HG01785	IBS	EUR	male
HG01786	IBS	EUR	female
HG01789	GBR	EUR	male
HG01790	GBR	EUR	female
HG01791	GBR	EUR	male
HG01794	CDX	EAS	female
HG01795	CDX	EAS	female
HG01796	CDX	EAS	female
HG01797	CDX	EAS	female
HG01798	CDX	EAS	female
HG01799	CDX	EAS	female
HG01800	CDX	EAS	female
HG01801	CDX	EAS	female
HG01802	CDX	EAS	female
HG01804	CDX	EAS	female
HG01805	CDX	EAS	female
HG01806	CDX	EAS	female
HG01807	CDX	EAS	female
HG01808	CDX	EAS	female
HG01809	CDX	EAS	female
HG01810	CDX	EAS	male
HG01811	CDX	EAS	male
HG01812	CDX	EAS	female
HG01813	CDX	EAS	female
HG01815	CDX	EAS	female
HG01816	CDX	EAS	male
HG01817	CDX	EAS	female
HG01840	KHV	EAS	male
HG01841	KHV	EAS	female
HG01842	KHV	EAS	male
HG01843	KHV	EAS	female
HG01844	KHV	EAS	male
HG01845	KHV	EAS	female
HG01846	KHV	EAS	male
HG01847	KHV	EAS	female
HG01848	KHV	EAS	female
HG01849	KHV	EAS	male
HG01850	KHV	EAS	female
HG01851	KHV	EAS	female
HG01852	KHV	EAS	male
HG01853	KHV	EAS	female
HG01855	KHV	EAS	female
HG01857	KHV	EAS	female
HG01858	KHV	EAS	female
HG01859	KHV	EAS	female
HG01860	KHV	EAS	male
HG01861	KHV	EAS	male
HG01862	KHV	EAS	female
HG01863	KHV	EAS	female
HG01864	KHV	EAS	male
HG01865	KHV	EAS	male
HG01866	KHV	EAS	male
HG01867	KHV	EAS	male
HG01868	KHV	EAS	female
HG01869	KHV	EAS	female
HG01870	KHV	EAS	female
HG01871	KHV	EAS	female
HG01872	KHV	EAS	male
HG01873	KHV	EAS	male
HG01874	KHV	EAS	female
HG01878	KHV	EAS	female
HG01879	ACB	AFR	male
HG01880	ACB	AFR	female
HG01882	ACB	AFR	male
HG01883	ACB	AFR	female
HG01885	ACB	AFR	male
HG01886	ACB	AFR	female
HG01889	ACB	AFR	female
HG01890	ACB	AFR	male
HG01892	PEL	AMR	male
HG01893	PEL	AMR	female
HG01894	ACB	AFR	female
HG01896	ACB	AFR	female
HG01912	ACB	AFR	male
HG01914	ACB	AFR	male
HG01915	ACB	AFR	female
HG01917	PEL	AMR	male
HG01918	PEL	AMR	female
HG01920	PEL	AMR	male
HG01921	PEL	AMR	female
HG01923	PEL	AMR	male
HG01924	PEL	AMR	female
HG01926	PEL	AMR	male
HG01927	PEL	AMR	female
HG01932	PEL	AMR	male
HG01933	PEL	AMR	female
HG01935	PEL	AMR	male
HG01936	PEL	AMR	female
HG01938	PEL	AMR	male
HG01939	PEL	AMR	female
HG01941	PEL	AMR	male
HG01942	PEL	AMR	female
HG01944	PEL	AMR	male
HG01945	PEL	AMR	female
HG01947	PEL	AMR	male
HG01948	PEL	AMR	female
HG01950	PEL	AMR	male
HG01951	PEL	AMR	female
HG01953	PEL	AMR	male
HG01954	PEL	AMR	female
HG01956	ACB	AFR	female
HG01958	ACB	AFR	female
HG01961	PEL	AMR	male
HG01965	PEL	AMR	female
HG01967	PEL	AMR	male
HG01968	PEL	AMR	female
HG01970	PEL	AMR	male
HG01971	PEL	AMR	female
HG01973	PEL	AMR	female
HG01974	PEL	AMR	male
HG01976	PEL	AMR	female
HG01977	PEL	AMR	male
HG01979	PEL	AMR	male
HG01980	PEL	AMR	female
HG01982	PEL	AMR	male
HG01985	ACB	AFR	female
HG01986	ACB	AFR	male
HG01988	ACB	AFR	male
HG01989	ACB	AFR	female
HG01990	ACB	AFR	male
HG01991	PEL	AMR	male
HG01992	PEL	AMR	female
HG01997	PEL	AMR	female
HG02002	PEL	AMR	male
HG02003	PEL	AMR	female
HG02006	PEL	AMR	female
HG02008	PEL	AMR	male
HG02009	ACB	AFR	male
HG02010	ACB	AFR	female
HG02012	ACB	AFR	female
HG02013	ACB	AFR	male
HG02014	ACB	AFR	male
HG02016	KHV	EAS	female
HG02017	KHV	EAS	male
HG02019	KHV	EAS	female
HG02020	KHV	EAS	male
HG02023	KHV	EAS	male
HG02025	KHV	EAS	female
HG02026	KHV	EAS	male
HG02028	KHV	EAS	female
HG02029	KHV	EAS	male
HG02031	KHV	EAS	female
HG02032	KHV	EAS	male
HG02035	KHV	EAS	male
HG02040	KHV	EAS	male
HG02047	KHV	EAS	male
HG02048	KHV	EAS	female
HG02049	KHV	EAS	female
HG02050	KHV	EAS	male
HG02051	ACB	AFR	male
HG02052	ACB	AFR	female
HG02053	ACB	AFR	male
HG02054	ACB	AFR	female
HG02057	KHV	EAS	female
HG02058	KHV	EAS	male
HG02060	KHV	EAS	female
HG02061	KHV	EAS	male
HG02064	KHV	EAS	male
HG02067	KHV	EAS	male
HG02069	KHV	EAS	female
HG02070	KHV	EAS	male
HG02072	KHV	EAS	female
HG02073	KHV	EAS	male
HG02075	KHV	EAS	female
HG02076	KHV	EAS	male
HG02078	KHV	EAS	female
HG02079	KHV	EAS	male
HG02081	KHV	EAS	female
HG02082	KHV	EAS	male
HG02084	KHV	EAS	female
HG02085	KHV	EAS	male
HG02086	KHV	EAS	female
HG02087	KHV	EAS	female
HG02088	KHV	EAS	male
HG02089	PEL	AMR	female
HG02090	PEL	AMR	male
HG02095	ACB	AFR	female
HG02102	PEL	AMR	female
HG02104	PEL	AMR	male
HG02105	PEL	AMR	female
HG02107	ACB	AFR	male
HG02108	ACB	AFR	female
HG02111	ACB	AFR	female
HG02113	KHV	EAS	female
HG02116	KHV	EAS	male
HG02121	KHV	EAS	female
HG02122	KHV	EAS	male
HG02127	KHV	EAS	female
HG02128	KHV	EAS	male
HG02130	KHV	EAS	female
HG02131	KHV	EAS	male
HG02133	KHV	EAS	female
HG02134	KHV	EAS	male
HG02136	KHV	EAS	female
HG02137	KHV	EAS	male
HG02138	KHV	EAS	male
HG02139	KHV	EAS	female
HG02140	KHV	EAS	female
HG02141	KHV	EAS	male
HG02142	KHV	EAS	female
HG02143	ACB	AFR	male
HG02144	ACB	AFR	female
HG02146	PEL	AMR	male
HG02147	PEL	AMR	female
HG02150	PEL	AMR	male
HG02151	CDX	EAS	female
HG02152	CDX	EAS	female
HG02153	CDX	EAS	female
HG02154	CDX	EAS	female
HG02155	CDX	EAS	female
HG02156	CDX	EAS	female
HG02164	CDX	EAS	female
HG02165	CDX	EAS	female
HG02166	CDX	EAS	female
HG02178	CDX	EAS	female
HG02179	CDX	EAS	female
HG02180	CDX	EAS	female
HG02181	CDX	EAS	female
HG02182	CDX	EAS	female
HG02184	CDX	EAS	female
HG02185	CDX	EAS	female
HG02186	CDX	EAS	female
HG02187	CDX	EAS	female
HG02188	CDX	EAS	female
HG02190	CDX	EAS	female
HG02215	GBR	EUR	female
HG02219	IBS	EUR	male
HG02220	IBS	EUR	female
HG02221	IBS	EUR	male
HG02223	IBS	EUR	female
HG02224	IBS	EUR	male
HG02230	IBS	EUR	female
HG02231	IBS	EUR	male
HG02232	IBS	EUR	female
HG02233	IBS	EUR	male
HG02235	IBS	EUR	female
HG02236	IBS	EUR	male
HG02238	IBS	EUR	male
HG02239	IBS	EUR	female
HG02250	CDX	EAS	male
HG02252	PEL	AMR	female
HG02253	PEL	AMR	male
HG02255	ACB	AFR	male
HG02256	ACB	AFR	female
HG02259	PEL	AMR	male
HG02260	PEL	AMR	female
HG02262	PEL	AMR	male
HG02265	PEL	AMR	male
HG02266	PEL	AMR	female
HG02271	PEL	AMR	male
HG02272	PEL	AMR	female
HG02274	PEL	AMR	male
HG02275	PEL	AMR	female
HG02277	PEL	AMR	male
HG02278	PEL	AMR	female
HG02281	ACB	AFR	male
HG02282	ACB	AFR	female
HG02283	ACB	AFR	male
HG02284	ACB	AFR	male
HG02285	PEL	AMR	male
HG02286	PEL	AMR	female
HG02291	PEL	AMR	male
HG02292	PEL	AMR	female
HG02298	PEL	AMR	female
HG02299	PEL	AMR	male
HG02301	PEL	AMR	female
HG02304	PEL	AMR	male
HG02307	ACB	AFR	male
HG02308	ACB	AFR	female
HG02309	ACB	AFR	female
HG02312	PEL	AMR	female
HG02314	ACB	AFR	male
HG02315	ACB	AFR	female
HG02317	ACB	AFR	male
HG02318	ACB	AFR	female
HG02322	ACB	AFR	female
HG02323	ACB	AFR	male
HG02325	ACB	AFR	female
HG02330	ACB	AFR	male
HG02332	ACB	AFR	male
HG02334	ACB	AFR	male
HG02337	ACB	AFR	female
HG02339	ACB	AFR	female
HG02343	ACB	AFR	male
HG02345	PEL	AMR	female
HG02348	PEL	AMR	female
HG02351	CDX	EAS	male
HG02353	CDX	EAS	male
HG02355	CDX	EAS	male
HG02356	CDX	EAS	male
HG02360	CDX	EAS	male
HG02364	CDX	EAS	male
HG02367	CDX	EAS	male
HG02371	CDX	EAS	male
HG02373	CDX	EAS	male
HG02374	CDX	EAS	male
HG02375	CDX	EAS	male
HG02379	CDX	EAS	male
HG02380	CDX	EAS	male
HG02382	CDX	EAS	male
HG02383	CDX	EAS	male
HG02384	CDX	EAS	male
HG02385	CDX	EAS	male
HG02386	CDX	EAS	male
HG02389	CDX	EAS	male
HG02390	CDX	EAS	male
HG02391	CDX	EAS	male
HG02392	CDX	EAS	male
HG02394	CDX	EAS	male
HG02395	CDX	EAS	male
HG02396	CDX	EAS	male
HG02397	CDX	EAS	male
HG02398	CDX	EAS	male
HG02399	CDX	EAS	male
HG02401	CDX	EAS	male
HG02402	CDX	EAS	male
HG02406	CDX	EAS	male
HG02407	CDX	EAS	male
HG02408	CDX	EAS	male
HG02409	CDX	EAS	male
HG02410	CDX	EAS	male
HG02419	ACB	AFR	female
HG02420	ACB	AFR	male
HG02425	PEL	AMR	female
HG02427	ACB	AFR	female
HG02429	ACB	AFR	male
HG02433	ACB	AFR	male
HG02439	ACB	AFR	male
HG02442	ACB	AFR	male
HG02445	ACB	AFR	male
HG02449	ACB	AFR	male
HG02450	ACB	AFR	female
HG02455	ACB	AFR	male
HG02461	GWD	AFR	male
HG02462	GWD	AFR	female
HG02464	GWD	AFR	male
HG02465	GWD	AFR	female
HG02470	ACB	AFR	male
HG02471	ACB	AFR	female
HG02476	ACB	AFR	female
HG02477	ACB	AFR	female
HG02479	ACB	AFR	female
HG02481	ACB	AFR	male
HG02484	ACB	AFR	male
HG02485	ACB	AFR	female
HG02489	ACB	AFR	male
HG02490	PJL	SAS	male
HG02491	PJL	SAS	female
HG02493	PJL	SAS	male
HG02494	PJL	SAS	female
HG02496	ACB	AFR	male
HG02497	ACB	AFR	female
HG02501	ACB	AFR	male
HG02502	ACB	AFR	female
HG02505	ACB	AFR	female
HG02508	ACB	AFR	female
HG02511	ACB	AFR	female
HG02512	KHV	EAS	male
HG02513	KHV	EAS	female
HG02521	KHV	EAS	male
HG02522	KHV	EAS	female
HG02536	ACB	AFR	male
HG02537	ACB	AFR	female
HG02541	ACB	AFR	male
HG02545	ACB	AFR	male
HG02546	ACB	AFR	female
HG02549	ACB	AFR	female
HG02554	ACB	AFR	male
HG02555	ACB	AFR	female
HG02557	ACB	AFR	male
HG02558	ACB	AFR	female
HG02561	GWD	AFR	male
HG02562	GWD	AFR	female
HG02568	GWD	AFR	female
HG02570	GWD	AFR	male
HG02571	GWD	AFR	female
HG02573	GWD	AFR	male
HG02574	GWD	AFR	female
HG02577	ACB	AFR	female
HG02580	ACB	AFR	female
HG02582	GWD	AFR	male
HG02583	GWD	AFR	female
HG02585	GWD	AFR	male
HG02586	GWD	AFR	female
HG02588	GWD	AFR	male
HG02589	GWD	AFR	female
HG02594	GWD	AFR	male
HG02595	GWD	AFR	female
HG02597	PJL	SAS	male
HG02600	PJL	SAS	male
HG02601	PJL	SAS	female
HG02603	PJL	SAS	male
HG02604	PJL	SAS	female
HG02610	GWD	AFR	male
HG02611	GWD	AFR	female
HG02613	GWD	AFR	male
HG02614	GWD	AFR	female
HG02620	GWD	AFR	male
HG02621	GWD	AFR	female
HG02623	GWD	AFR	male
HG02624	GWD	AFR	female
HG02628	GWD	AFR	male
HG02629	GWD	AFR	female
HG02634	GWD	AFR	male
HG02635	GWD	AFR	female
HG02642	GWD	AFR	male
HG02643	GWD	AFR	female
HG02645	GWD	AFR	male
HG02646	GWD	AFR	female
HG02648	PJL	SAS	male
HG02649	PJL	SAS	female
HG02651	PJL	SAS	male
HG02652	PJL	SAS	female
HG02654	PJL	SAS	male
HG02655	PJL	SAS	female
HG02657	PJL	SAS	male
HG02658	PJL	SAS	female
HG02660	PJL	SAS	male
HG02661	PJL	SAS	female
HG02666	GWD	AFR	male
HG02667	GWD	AFR	female
HG02675	GWD	AFR	male
HG02676	GWD	AFR	female
HG02678	GWD	AFR	male
HG02679	GWD	AFR	female
HG02681	PJL	SAS	male
HG02682	PJL	SAS	female
HG02684	PJL	SAS	male
HG02685	PJL	SAS	female
HG02687	PJL	SAS	male
HG02688	PJL	SAS	female
HG02690	PJL	SAS	male
HG02691	PJL	SAS	female
HG02694	PJL	SAS	female
HG02696	PJL	SAS	male
HG02697	PJL	SAS	female
HG02699	PJL	SAS	male
HG02700	PJL	SAS	female
HG02702	GWD	AFR	male
HG02703	GWD	AFR	female
HG02715	GWD	AFR	male
HG02716	GWD	AFR	female
HG02721	GWD	AFR	male
HG02722	GWD	AFR	female
HG02724	PJL	SAS	male
HG02725	PJL	SAS	female
HG02727	PJL	SAS	male
HG02728	PJL	SAS	female
HG02731	PJL	SAS	female
HG02733	PJL	SAS	male
HG02734	PJL	SAS	female
HG02736	PJL	SAS	male
HG02737	PJL	SAS	female
HG02756	GWD	AFR	male
HG02757	GWD	AFR	female
HG02759	GWD	AFR	male
HG02760	GWD	AFR	female
HG02763	GWD	AFR	female
HG02768	GWD	AFR	male
HG02769	GWD	AFR	female
HG02771	GWD	AFR	male
HG02772	GWD	AFR	female
HG02774	PJL	SAS	male
HG02775	PJL	SAS	female
HG02778	PJL	SAS	female
HG02780	PJL	SAS	male
HG02783	PJL	SAS	male
HG02784	PJL	SAS	female
HG02786	PJL	SAS	male
HG02787	PJL	SAS	female
HG02789	PJL	SAS	male
HG02790	PJL	SAS	female
HG02792	PJL	SAS	male
HG02793	PJL	SAS	female
HG02798	GWD	AFR	male
HG02799	GWD	AFR	female
HG02804	GWD	AFR	male
HG02805	GWD	AFR	female
HG02807	GWD	AFR	male
HG02808	GWD	AFR	female
HG02810	GWD	AFR	male
HG02811	GWD	AFR	female
HG02813	GWD	AFR	male
HG02814	GWD	AFR	female
HG02816	GWD	AFR	male
HG02817	GWD	AFR	female
HG02819	GWD	AFR	male
HG02820	GWD	AFR	female
HG02836	GWD	AFR	male
HG02837	GWD	AFR	female
HG02839	GWD	AFR	male
HG02840	GWD	AFR	female
HG02851	GWD	AFR	male
HG02852	GWD	AFR	female
HG02854	GWD	AFR	male
HG02855	GWD	AFR	female
HG02860	GWD	AFR	male
HG02861	GWD	AFR	female
HG02870	GWD	AFR	female
HG02878	GWD	AFR	male
HG02879	GWD	AFR	female
HG02881	GWD	AFR	male
HG02882	GWD	AFR	female
HG02884	GWD	AFR	male
HG02885	GWD	AFR	female
HG02887	GWD	AFR	male
HG02888	GWD	AFR	female
HG02890	GWD	AFR	male
HG02891	GWD	AFR	female
HG02895	GWD	AFR	male
HG02896	GWD	AFR	female
HG02922	ESN	AFR	female
HG02923	ESN	AFR	male
HG02938	ESN	AFR	male
HG02941	ESN	AFR	male
HG02943	ESN	AFR	female
HG02944	ESN	AFR	male
HG02946	ESN	AFR	female
HG02947	ESN	AFR	male
HG02952	ESN	AFR	female
HG02953	ESN	AFR	male
HG02968	ESN	AFR	male
HG02970	ESN	AFR	female
HG02971	ESN	AFR	male
HG02973	ESN	AFR	male
HG02974	ESN	AFR	female
HG02976	ESN	AFR	female
HG02977	ESN	AFR	male
HG02979	ESN	AFR	female
HG02981	ESN	AFR	male
HG02982	GWD	AFR	male
HG02983	GWD	AFR	female
HG03006	BEB	SAS	male
HG03007	BEB	SAS	female
HG03009	BEB	SAS	male
HG03012	BEB	SAS	male
HG03015	PJL	SAS	male
HG03016	PJL	SAS	female
HG03018	PJL	SAS	male
HG03019	PJL	SAS	female
HG03021	PJL	SAS	male
HG03022	PJL	SAS	female
HG03024	GWD	AFR	male
HG03025	GWD	AFR	female
HG03027	GWD	AFR	male
HG03028	GWD	AFR	female
HG03039	GWD	AFR	male
HG03040	GWD	AFR	female
HG03045	GWD	AFR	male
HG03046	GWD	AFR	female
HG03048	GWD	AFR	male
HG03049	GWD	AFR	female
HG03052	MSL	AFR	female
HG03054	MSL	AFR	male
HG03055	MSL	AFR	female
HG03057	MSL	AFR	male
HG03058	MSL	AFR	female
HG03060	MSL	AFR	male
HG03061	MSL	AFR	female
HG03063	MSL	AFR	male
HG03064	MSL	AFR	female
HG03066	MSL	AFR	male
HG03069	MSL	AFR	male
HG03072	MSL	AFR	male
HG03073	MSL	AFR	female
HG03074	MSL	AFR	male
HG03077	MSL	AFR	male
HG03078	MSL	AFR	male
HG03079	MSL	AFR	female
HG03081	MSL	AFR	male
HG03082	MSL	AFR	female
HG03084	MSL	AFR	male
HG03085	MSL	AFR	female
HG03086	MSL	AFR	female
HG03088	MSL	AFR	female
HG03091	MSL	AFR	female
HG03095	MSL	AFR	female
HG03096	MSL	AFR	male
HG03097	MSL	AFR	female
HG03099	ESN	AFR	female
HG03100	ESN	AFR	male
HG03103	ESN	AFR	male
HG03105	ESN	AFR	female
HG03108	ESN	AFR	female
HG03109	ESN	AFR	male
HG03111	ESN	AFR	female
HG03112	ESN	AFR	male
HG03114	ESN	AFR	female
HG03115	ESN	AFR	male
HG03117	ESN	AFR	female
HG03118	ESN	AFR	male
HG03120	ESN	AFR	male
HG03121	ESN	AFR	female
HG03123	ESN	AFR	female
HG03124	ESN	AFR	male
HG03126	ESN	AFR	female
HG03127	ESN	AFR	male
HG03129	ESN	AFR	female
HG03130	ESN	AFR	male
HG03132	ESN	AFR	female
HG03133	ESN	AFR	male
HG03135	ESN	AFR	female
HG03136	ESN	AFR	male
HG03139	ESN	AFR	male
HG03157	ESN	AFR	male
HG03159	ESN	AFR	female
HG03160	ESN	AFR	male
HG03162	ESN	AFR	female
HG03163	ESN	AFR	male
HG03166	ESN	AFR	male
HG03168	ESN	AFR	female
HG03169	ESN	AFR	male
HG03172	ESN	AFR	male
HG03175	ESN	AFR	male
HG03189	ESN	AFR	female
HG03190	ESN	AFR	male
HG03193	ESN	AFR	male
HG03195	ESN	AFR	female
HG03196	ESN	AFR	male
HG03198	ESN	AFR	female
HG03199	ESN	AFR	male
HG03202	ESN	AFR	male
HG03209	MSL	AFR	male
HG03212	MSL	AFR	female
HG03224	MSL	AFR	male
HG03225	MSL	AFR	male
HG03228	PJL	SAS	male
HG03229	PJL	SAS	female
HG03234	PJL	SAS	male
HG03235	PJL	SAS	female
HG03237	PJL	SAS	male
HG03238	PJL	SAS	female
HG03240	GWD	AFR	male
HG03241	GWD	AFR	female
HG03246	GWD	AFR	male
HG03247	GWD	AFR	female
HG03258	GWD	AFR	male
HG03259	GWD	AFR	female
HG03265	ESN	AFR	male
HG03267	ESN	AFR	female
HG03268	ESN	AFR	male
HG03270	ESN	AFR	female
HG03271	ESN	AFR	male
HG03279	ESN	AFR	female
HG03280	ESN	AFR	male
HG03291	ESN	AFR	female
HG03294	ESN	AFR	female
HG03295	ESN	AFR	male
HG03297	ESN	AFR	female
HG03298	ESN	AFR	male
HG03300	ESN	AFR	female
HG03301	ESN	AFR	male
HG03303	ESN	AFR	female
HG03304	ESN	AFR	male
HG03311	ESN	AFR	male
HG03313	ESN	AFR	male
HG03342	ESN	AFR	female
HG03343	ESN	AFR	male
HG03351	ESN	AFR	female
HG03352	ESN	AFR	male
HG03354	ESN	AFR	female
HG03363	ESN	AFR	female
HG03366	ESN	AFR	female
HG03367	ESN	AFR	male
HG03369	ESN	AFR	female
HG03370	ESN	AFR	male
HG03372	ESN	AFR	female
HG03376	MSL	AFR	male
HG03378	MSL	AFR	female
HG03380	MSL	AFR	female
HG03382	MSL	AFR	male
HG03385	MSL	AFR	male
HG03388	MSL	AFR	male
HG03391	MSL	AFR	male
HG03394	MSL	AFR	male
HG03397	MSL	AFR	male
HG03401	MSL	AFR	female
HG03410	MSL	AFR	female
HG03419	MSL	AFR	female
HG03428	MSL	AFR	female
HG03432	MSL	AFR	male
HG03433	MSL	AFR	male
HG03436	MSL	AFR	male
HG03437	MSL	AFR	female
HG03439	MSL	AFR	male
HG03442	MSL	AFR	male
HG03445	MSL	AFR	male
HG03446	MSL	AFR	female
HG03449	MSL	AFR	female
HG03451	MSL	AFR	male
HG03452	MSL	AFR	female
HG03455	MSL	AFR	female
HG03457	MSL	AFR	male
HG03458	MSL	AFR	female
HG03460	MSL	AFR	male
HG03461	MSL	AFR	female
HG03464	MSL	AFR	female
HG03469	MSL	AFR	male
HG03470	MSL	AFR	female
HG03472	MSL	AFR	male
HG03473	MSL	AFR	female
HG03476	MSL	AFR	female
HG03478	MSL	AFR	male
HG03479	MSL	AFR	female
HG03484	MSL	AFR	male
HG03485	MSL	AFR	female
HG03488	PJL	SAS	female
HG03490	PJL	SAS	male
HG03491	PJL	SAS	female
HG03499	ESN	AFR	female
HG03511	ESN	AFR	female
HG03514	ESN	AFR	female
HG03515	ESN	AFR	male
HG03517	ESN	AFR	female
HG03518	ESN	AFR	male
HG03520	ESN	AFR	female
HG03521	ESN	AFR	male
HG03538	GWD	AFR	male
HG03539	GWD	AFR	female
HG03547	MSL	AFR	male
HG03548	MSL	AFR	female
HG03556	MSL	AFR	male
HG03557	MSL	AFR	female
HG03558	MSL	AFR	female
HG03559	MSL	AFR	male
HG03563	MSL	AFR	female
HG03565	MSL	AFR	male
HG03567	MSL	AFR	female
HG03571	MSL	AFR	male
HG03572	MSL	AFR	female
HG03575	MSL	AFR	female
HG03577	MSL	AFR	male
HG03578	MSL	AFR	female
HG03583	MSL	AFR	female
HG03585	BEB	SAS	male
HG03589	BEB	SAS	female
HG03593	BEB	SAS	male
HG03594	BEB	SAS	male
HG03595	BEB	SAS	female
HG03598	BEB	SAS	female
HG03600	BEB	SAS	male
HG03603	BEB	SAS	male
HG03604	BEB	SAS	female
HG03607	BEB	SAS	female
HG03611	BEB	SAS	female
HG03615	BEB	SAS	male
HG03616	BEB	SAS	female
HG03619	PJL	SAS	female
HG03624	PJL	SAS	male
HG03625	PJL	SAS	female
HG03629	PJL	SAS	male
HG03631	PJL	SAS	female
HG03634	PJL	SAS	female
HG03636	PJL	SAS	male
HG03640	PJL	SAS	female
HG03642	STU	SAS	female
HG03643	STU	SAS	female
HG03644	STU	SAS	male
HG03645	STU	SAS	female
HG03646	STU	SAS	male
HG03649	PJL	SAS	male
HG03652	PJL	SAS	male
HG03653	PJL	SAS	female
HG03660	PJL	SAS	male
HG03663	PJL	SAS	male
HG03667	PJL	SAS	male
HG03668	PJL	SAS	female
HG03672	STU	SAS	male
HG03673	STU	SAS	female
HG03679	STU	SAS	male
HG03680	STU	SAS	male
HG03681	STU	SAS	male
HG03684	STU	SAS	female
HG03685	STU	SAS	male
HG03686	STU	SAS	male
HG03687	STU	SAS	male
HG03689	STU	SAS	female
HG03690	STU	SAS	female
HG03691	STU	SAS	male
HG03692	STU	SAS	female
HG03693	STU	SAS	male
HG03694	STU	SAS	male
HG03695	STU	SAS	male
HG03696	STU	SAS	male
HG03697	STU	SAS	male
HG03698	STU	SAS	female
HG03702	PJL	SAS	male
HG03703	PJL	SAS	female
HG03705	PJL	SAS	male
HG03706	PJL	SAS	female
HG03708	PJL	SAS	male
HG03709	PJL	SAS	female
HG03711	STU	SAS	male
HG03713	ITU	SAS	male
HG03714	ITU	SAS	female
HG03716	ITU	SAS	male
HG03717	ITU	SAS	female
HG03718	ITU	SAS	male
HG03720	ITU	SAS	male
HG03722	ITU	SAS	female
HG03727	ITU	SAS	male
HG03729	ITU	SAS	male
HG03730	ITU	SAS	female
HG03731	ITU	SAS	female
HG03733	STU	SAS	female
HG03736	STU	SAS	female
HG03738	STU	SAS	male
HG03740	STU	SAS	male
HG03741	STU	SAS	female
HG03742	ITU	SAS	male
HG03743	STU	SAS	male
HG03744	STU	SAS	male
HG03745	STU	SAS	male
HG03746	STU	SAS	male
HG03750	STU	SAS	male
HG03752	STU	SAS	female
HG03753	STU	SAS	male
HG03754	STU	SAS	female
HG03755	STU	SAS	male
HG03756	STU	SAS	female
HG03757	STU	SAS	female
HG03760	STU	SAS	female
HG03762	PJL	SAS	female
HG03765	PJL	SAS	female
HG03767	PJL	SAS	male
HG03770	ITU	SAS	female
HG03771	ITU	SAS	male
HG03772	ITU	SAS	female
HG03773	ITU	SAS	male
HG03774	ITU	SAS	female
HG03775	ITU	SAS	male
HG03777	ITU	SAS	male
HG03778	ITU	SAS	male
HG03779	ITU	SAS	male
HG03780	ITU	SAS	female
HG03781	ITU	SAS	female
HG03782	ITU	SAS	female
HG03784	ITU	SAS	female
HG03785	ITU	SAS	male
HG03786	ITU	SAS	male
HG03787	ITU	SAS	female
HG03788	ITU	SAS	male
HG03789	ITU	SAS	female
HG03790	ITU	SAS	male
HG03792	ITU	SAS	male
HG03793	BEB	SAS	female
HG03796	BEB	SAS	female
HG03800	BEB	SAS	male
HG03802	BEB	SAS	female
HG03803	BEB	SAS	male
HG03805	BEB	SAS	female
HG03808	BEB	SAS	female
HG03809	BEB	SAS	male
HG03812	BEB	SAS	male
HG03814	BEB	SAS	female
HG03815	BEB	SAS	male
HG03817	BEB	SAS	female
HG03821	BEB	SAS	male
HG03823	BEB	SAS	female
HG03824	BEB	SAS	male
HG03826	BEB	SAS	female
HG03829	BEB	SAS	female
HG03830	BEB	SAS	male
HG03832	BEB	SAS	female
HG03833	BEB	SAS	male
HG03836	STU	SAS	female
HG03837	STU	SAS	male
HG03838	STU	SAS	female
HG03844	STU	SAS	male
HG03846	STU	SAS	male
HG03848	STU	SAS	male
HG03849	STU	SAS	female
HG03850	STU	SAS	male
HG03851	STU	SAS	male
HG03854	STU	SAS	male
HG03856	STU	SAS	male
HG03857	STU	SAS	female
HG03858	STU	SAS	female
HG03861	ITU	SAS	female
HG03862	ITU	SAS	female
HG03863	ITU	SAS	female
HG03864	ITU	SAS	male
HG03866	ITU	SAS	male
HG03867	ITU	SAS	male
HG03868	ITU	SAS	female
HG03869	ITU	SAS	male
HG03870	ITU	SAS	male
HG03871	ITU	SAS	male
HG03872	ITU	SAS	male
HG03873	ITU	SAS	female
HG03874	ITU	SAS	female
HG03875	ITU	SAS	male
HG03882	ITU	SAS	female
HG03884	STU	SAS	female
HG03885	STU	SAS	male
HG03886	STU	SAS	female
HG03887	STU	SAS	male
HG03888	STU	SAS	female
HG03890	STU	SAS	male
HG03894	STU	SAS	female
HG03895	STU	SAS	female
HG03896	STU	SAS	male
HG03897	STU	SAS	female
HG03898	STU	SAS	female
HG03899	STU	SAS	male
HG03900	STU	SAS	male
HG03902	BEB	SAS	male
HG03905	BEB	SAS	male
HG03907	BEB	SAS	female
HG03908	BEB	SAS	male
HG03910	BEB	SAS	female
HG03911	BEB	SAS	male
HG03913	BEB	SAS	female
HG03914	BEB	SAS	male
HG03916	BEB	SAS	female
HG03917	BEB	SAS	male
HG03919	BEB	SAS	female
HG03920	BEB	SAS	male
HG03922	BEB	SAS	female
HG03925	BEB	SAS	female
HG03926	BEB	SAS	male
HG03928	BEB	SAS	female
HG03931	BEB	SAS	female
HG03934	BEB	SAS	female
HG03937	BEB	SAS	female
HG03940	BEB	SAS	female
HG03941	BEB	SAS	male
HG03943	STU	SAS	male
HG03944	STU	SAS	female
HG03945	STU	SAS	female
HG03947	STU	SAS	female
HG03949	STU	SAS	female
HG03950	STU	SAS	male
HG03951	STU	SAS	female
HG03953	STU	SAS	male
HG03955	STU	SAS	female
HG03960	ITU	SAS	male
HG03963	ITU	SAS	male
HG03965	ITU	SAS	male
HG03967	ITU	SAS	male
HG03968	ITU	SAS	female
HG03969	ITU	SAS	male
HG03971	ITU	SAS	male
HG03973	ITU	SAS	female
HG03974	ITU	SAS	male
HG03976	ITU	SAS	male
HG03977	ITU	SAS	female
HG03978	ITU	SAS	male
HG03985	STU	SAS	male
HG03986	STU	SAS	female
HG03989	STU	SAS	female
HG03990	STU	SAS	male
HG03991	STU	SAS	male
HG03995	STU	SAS	female
HG03998	STU	SAS	male
HG03999	STU	SAS	male
HG04001	ITU	SAS	female
HG04002	ITU	SAS	male
HG04003	STU	SAS	male
HG04006	STU	SAS	male
HG04014	ITU	SAS	female
HG04015	ITU	SAS	male
HG04017	ITU	SAS	male
HG04018	ITU	SAS	female
HG04019	ITU	SAS	male
HG04020	ITU	SAS	male
HG04022	ITU	SAS	male
HG04023	ITU	SAS	male
HG04025	ITU	SAS	female
HG04026	ITU	SAS	female
HG04029	STU	SAS	female
HG04033	STU	SAS	male
HG04035	STU	SAS	female
HG04038	STU	SAS	female
HG04039	STU	SAS	male
HG04042	STU	SAS	female
HG04047	STU	SAS	female
HG04054	ITU	SAS	female
HG04056	ITU	SAS	male
HG04059	ITU	SAS	female
HG04060	ITU	SAS	male
HG04061	ITU	SAS	male
HG04062	ITU	SAS	female
HG04063	ITU	SAS	female
HG04070	ITU	SAS	female
HG04075	STU	SAS	female
HG04076	ITU	SAS	female
HG04080	ITU	SAS	male
HG04090	ITU	SAS	female
HG04093	ITU	SAS	male
HG04094	ITU	SAS	male
HG04096	ITU	SAS	male
HG04098	ITU	SAS	male
HG04099	STU	SAS	female
HG04100	STU	SAS	male
HG04106	STU	SAS	female
HG04107	STU	SAS	male
HG04118	ITU	SAS	female
HG04131	BEB	SAS	male
HG04134	BEB	SAS	male
HG04140	BEB	SAS	male
HG04141	BEB	SAS	female
HG04144	BEB	SAS	female
HG04146	BEB	SAS	male
HG04152	BEB	SAS	male
HG04153	BEB	SAS	female
HG04155	BEB	SAS	male
HG04156	BEB	SAS	female
HG04158	BEB	SAS	male
HG04159	BEB	SAS	female
HG04161	BEB	SAS	male
HG04162	BEB	SAS	female
HG04164	BEB	SAS	male
HG04171	BEB	SAS	female
HG04173	BEB	SAS	male
HG04176	BEB	SAS	male
HG04177	BEB	SAS	female
HG04180	BEB	SAS	female
HG04182	BEB	SAS	male
HG04183	BEB	SAS	female
HG04185	BEB	SAS	male
HG04186	BEB	SAS	female
HG04188	BEB	SAS	male
HG04189	BEB	SAS	female
HG04194	BEB	SAS	male
HG04195	BEB	SAS	female
HG04198	ITU	SAS	male
HG04200	ITU	SAS	female
HG04202	ITU	SAS	female
HG04206	ITU	SAS	male
HG04209	ITU	SAS	female
HG04210	STU	SAS	male
HG04211	ITU	SAS	male
HG04212	ITU	SAS	female
HG04214	ITU	SAS	female
HG04216	ITU	SAS	female
HG04219	ITU	SAS	male
HG04222	ITU	SAS	male
HG04225	ITU	SAS	male
HG04227	STU	SAS	female
HG04229	STU	SAS	male
HG04235	ITU	SAS	male
HG04238	ITU	SAS	male
HG04239	ITU	SAS	male
NA06984	CEU	EUR	male
NA06985	CEU	EUR	female
NA06986	CEU	EUR	male
NA06989	CEU	EUR	female
NA06994	CEU	EUR	male
NA07000	CEU	EUR	female
NA07037	CEU	EUR	female
NA07048	CEU	EUR	male
NA07051	CEU	EUR	male
NA07056	CEU	EUR	female
NA07347	CEU	EUR	male
NA07357	CEU	EUR	male
NA10847	CEU	EUR	female
NA10851	CEU	EUR	male
NA11829	CEU	EUR	male
NA11830	CEU	EUR	female
NA11831	CEU	EUR	male
NA11832	CEU	EUR	female
NA11840	CEU	EUR	female
NA11843	CEU	EUR	male
NA11881	CEU	EUR	male
NA11892	CEU	EUR	female
NA11893	CEU	EUR	male
NA11894	CEU	EUR	female
NA11918	CEU	EUR	female
NA11919	CEU	EUR	male
NA11920	CEU	EUR	female
NA11930	CEU	EUR	male
NA11931	CEU	EUR	female
NA11932	CEU	EUR	male
NA11933	CEU	EUR	female
NA11992	CEU	EUR	male
NA11994	CEU	EUR	male
NA11995	CEU	EUR	female
NA12003	CEU	EUR	male
NA12004	CEU	EUR	female
NA12005	CEU	EUR	male
NA12006	CEU	EUR	female
NA12043	CEU	EUR	male
NA12044	CEU	EUR	female
NA12045	CEU	EUR	male
NA12046	CEU	EUR	female
NA12058	CEU	EUR	female
NA12144	CEU	EUR	male
NA12154	CEU	EUR	male
NA12155	CEU	EUR	male
NA12156	CEU	EUR	female
NA12234	CEU	EUR	female
NA12249	CEU	EUR	female
NA12272	CEU	EUR	male
NA12273	CEU	EUR	female
NA12275	CEU	EUR	female
NA12282	CEU	EUR	male
NA12283	CEU	EUR	female
NA12286	CEU	EUR	male
NA12287	CEU	EUR	female
NA12340	CEU	EUR	male
NA12341	CEU	EUR	female
NA12342	CEU	EUR	male
NA12347	CEU	EUR	male
NA12348	CEU	EUR	female
NA12383	CEU	EUR	female
NA12399	CEU	EUR	male
NA12400	CEU	EUR	female
NA12413	CEU	EUR	male
NA12414	CEU	EUR	female
NA12489	CEU	EUR	female
NA12546	CEU	EUR	male
NA12716	CEU	EUR	male
NA12717	CEU	EUR	female
NA12718	CEU	EUR	female
NA12748	CEU	EUR	male
NA12749	CEU	EUR	female
NA12750	CEU	EUR	male
NA12751	CEU	EUR	female
NA12760	CEU	EUR	male
NA12761	CEU	EUR	female
NA12762	CEU	EUR	male
NA12763	CEU	EUR	female
NA12775	CEU	EUR	male
NA12776	CEU	EUR	female
NA12777	CEU	EUR	male
NA12778	CEU	EUR	female
NA12812	CEU	EUR	male
NA12813	CEU	EUR	female
NA12814	CEU	EUR	male
NA12815	CEU	EUR	female
NA12827	CEU	EUR	male
NA12828	CEU	EUR	female
NA12829	CEU	EUR	male
NA12830	CEU	EUR	female
NA12842	CEU	EUR	male
NA12843	CEU	EUR	female
NA12872	CEU	EUR	male
NA12873	CEU	EUR	female
NA12874	CEU	EUR	male
NA12878	CEU	EUR	female
NA12889	CEU	EUR	male
NA12890	CEU	EUR	female
NA18486	YRI	AFR	male
NA18488	YRI	AFR	female
NA18489	YRI	AFR	female
NA18498	YRI	AFR	male
NA18499	YRI	AFR	female
NA18501	YRI	AFR	male
NA18502	YRI	AFR	female
NA18504	YRI	AFR	male
NA18505	YRI	AFR	female
NA18507	YRI	AFR	male
NA18508	YRI	AFR	female
NA18510	YRI	AFR	male
NA18511	YRI	AFR	female
NA18516	YRI	AFR	male
NA18517	YRI	AFR	female
NA18519	YRI	AFR	male
NA18520	YRI	AFR	female
NA18522	YRI	AFR	male
NA18523	YRI	AFR	female
NA18525	CHB	EAS	female
NA18526	CHB	EAS	female
NA18528	CHB	EAS	female
NA18530	CHB	EAS	male
NA18531	CHB	EAS	female
NA18532	CHB	EAS	female
NA18533	CHB	EAS	female
NA18534	CHB	EAS	male
NA18535	CHB	EAS	female
NA18536	CHB	EAS	male
NA18537	CHB	EAS	female
NA18538	CHB	EAS	female
NA18539	CHB	EAS	female
NA18541	CHB	EAS	female
NA18542	CHB	EAS	female
NA18543	CHB	EAS	male
NA18544	CHB	EAS	male
NA18545	CHB	EAS	female
NA18546	CHB	EAS	male
NA18547	CHB	EAS	female
NA18548	CHB	EAS	male
NA18549	CHB	EAS	male
NA18550	CHB	EAS	female
NA18552	CHB	EAS	female
NA18553	CHB	EAS	female
NA18555	CHB	EAS	female
NA18557	CHB	EAS	male
NA18558	CHB	EAS	male
NA18559	CHB	EAS	male
NA18560	CHB	EAS	female
NA18561	CHB	EAS	male
NA18562	CHB	EAS	male
NA18563	CHB	EAS	male
NA18564	CHB	EAS	female
NA18565	CHB	EAS	female
NA18566	CHB	EAS	female
NA18567	CHB	EAS	female
NA18570	CHB	EAS	female
NA18571	CHB	EAS	female
NA18572	CHB	EAS	male
NA18573	CHB	EAS	female
NA18574	CHB	EAS	female
NA18577	CHB	EAS	female
NA18579	CHB	EAS	female
NA18582	CHB	EAS	female
NA18591	CHB	EAS	female
NA18592	CHB	EAS	female
NA18593	CHB	EAS	female
NA18595	CHB	EAS	female
NA18596	CHB	EAS	female
NA18597	CHB	EAS	female
NA18599	CHB	EAS	female
NA18602	CHB	EAS	female
NA18603	CHB	EAS	male
NA18605	CHB	EAS	male
NA18606	CHB	EAS	male
NA18608	CHB	EAS	male
NA18609	CHB	EAS	male
NA18610	CHB	EAS	female
NA18611	CHB	EAS	male
NA18612	CHB	EAS	male
NA18613	CHB	EAS	male
NA18614	CHB	EAS	female
NA18615	CHB	EAS	female
NA18616	CHB	EAS	female
NA18617	CHB	EAS	female
NA18618	CHB	EAS	female
NA18619	CHB	EAS	female
NA18620	CHB	EAS	male
NA18621	CHB	EAS	male
NA18622	CHB	EAS	male
NA18623	CHB	EAS	male
NA18624	CHB	EAS	male
NA18625	CHB	EAS	female
NA18626	CHB	EAS	female
NA18627	CHB	EAS	female
NA18628	CHB	EAS	female
NA18629	CHB	EAS	male
NA18630	CHB	EAS	female
NA18631	CHB	EAS	female
NA18632	CHB	EAS	male
NA18633	CHB	EAS	male
NA18634	CHB	EAS	female
NA18635	CHB	EAS	male
NA18636	CHB	EAS	male
NA18637	CHB	EAS	male
NA18638	CHB	EAS	male
NA18639	CHB	EAS	male
NA18640	CHB	EAS	female
NA18641	CHB	EAS	female
NA18642	CHB	EAS	female
NA18643	CHB	EAS	male
NA18644	CHB	EAS	female
NA18645	CHB	EAS	male
NA18646	CHB	EAS	female
NA18647	CHB	EAS	male
NA18648	CHB	EAS	male
NA18740	CHB	EAS	male
NA18745	CHB	EAS	male
NA18747	CHB	EAS	male
NA18748	CHB	EAS	male
NA18749	CHB	EAS	male
NA18757	CHB	EAS	male
NA18853	YRI	AFR	male
NA18856	YRI	AFR	male
NA18858	YRI	AFR	female
NA18861	YRI	AFR	female
NA18864	YRI	AFR	female
NA18865	YRI	AFR	male
NA18867	YRI	AFR	female
NA18868	YRI	AFR	male
NA18870	YRI	AFR	female
NA18871	YRI	AFR	male
NA18873	YRI	AFR	female
NA18874	YRI	AFR	male
NA18876	YRI	AFR	female
NA18877	YRI	AFR	male
NA18878	YRI	AFR	female
NA18879	YRI	AFR	male
NA18881	YRI	AFR	female
NA18907	YRI	AFR	female
NA18908	YRI	AFR	male
NA18909	YRI	AFR	female
NA18910	YRI	AFR	male
NA18912	YRI	AFR	female
NA18915	YRI	AFR	male
NA18916	YRI	AFR	female
NA18917	YRI	AFR	male
NA18923	YRI	AFR	male
NA18924	YRI	AFR	female
NA18933	YRI	AFR	female
NA18934	YRI	AFR	male
NA18939	JPT	EAS	female
NA18940	JPT	EAS	male
NA18941	JPT	EAS	female
NA18942	JPT	EAS	female
NA18943	JPT	EAS	male
NA18944	JPT	EAS	male
NA18945	JPT	EAS	male
NA18946	JPT	EAS	female
NA18947	JPT	EAS	female
NA18948	JPT	EAS	male
NA18949	JPT	EAS	female
NA18950	JPT	EAS	female
NA18951	JPT	EAS	female
NA18952	JPT	EAS	male
NA18953	JPT	EAS	male
NA18954	JPT	EAS	female
NA18956	JPT	EAS	female
NA18957	JPT	EAS	female
NA18959	JPT	EAS	male
NA18960	JPT	EAS	male
NA18961	JPT	EAS	male
NA18962	JPT	EAS	male
NA18963	JPT	EAS	female
NA18964	JPT	EAS	female
NA18965	JPT	EAS	male
NA18966	JPT	EAS	male
NA18967	JPT	EAS	male
NA18968	JPT	EAS	female
NA18969	JPT	EAS	female
NA18970	JPT	EAS	male
NA18971	JPT	EAS	male
NA18972	JPT	EAS	female
NA18973	JPT	EAS	female
NA18974	JPT	EAS	male
NA18975	JPT	EAS	female
NA18976	JPT	EAS	female
NA18977	JPT	EAS	male
NA18978	JPT	EAS	female
NA18979	JPT	EAS	female
NA18980	JPT	EAS	female
NA18981	JPT	EAS	female
NA18982	JPT	EAS	male
NA18983	JPT	EAS	male
NA18984	JPT	EAS	male
NA18985	JPT	EAS	male
NA18986	JPT	EAS	male
NA18987	JPT	EAS	female
NA18988	JPT	EAS	male
NA18989	JPT	EAS	male
NA18990	JPT	EAS	male
NA18991	JPT	EAS	female
NA18992	JPT	EAS	female
NA18993	JPT	EAS	female
NA18994	JPT	EAS	male
NA18995	JPT	EAS	male
NA18997	JPT	EAS	female
NA18998	JPT	EAS	female
NA18999	JPT	EAS	female
NA19000	JPT	EAS	male
NA19001	JPT	EAS	female
NA19002	JPT	EAS	female
NA19003	JPT	EAS	female
NA19004	JPT	EAS	male
NA19005	JPT	EAS	male
NA19006	JPT	EAS	male
NA19007	JPT	EAS	male
NA19009	JPT	EAS	male
NA19010	JPT	EAS	female
NA19011	JPT	EAS	female
NA19012	JPT	EAS	male
NA19017	LWK	AFR	female
NA19019	LWK	AFR	female
NA19020	LWK	AFR	male
NA19023	LWK	AFR	female
NA19024	LWK	AFR	female
NA19025	LWK	AFR	male
NA19026	LWK	AFR	male
NA19027	LWK	AFR	male
NA19028	LWK	AFR	male
NA19030	LWK	AFR	female
NA19031	LWK	AFR	male
NA19035	LWK	AFR	male
NA19036	LWK	AFR	female
NA19037	LWK	AFR	female
NA19038	LWK	AFR	female
NA19041	LWK	AFR	male
NA19042	LWK	AFR	female
NA19043	LWK	AFR	male
NA19054	JPT	EAS	female
NA19055	JPT	EAS	male
NA19056	JPT	EAS	male
NA19057	JPT	EAS	female
NA19058	JPT	EAS	male
[truncated: 505 more rows]

## Sheet: 3K Rice Genomes Info
B001	GJ-tmp
B002	GJ-tmp
B003	GJ-adm
B004	GJ-tmp
B005	GJ-tmp
B006	XI-adm
B007	XI-adm
B008	GJ-tmp
B009	XI-1A
B010	XI-1A
B011	XI-adm
B012	XI-2
B013	XI-adm
B014	GJ-tmp
B015	XI-1A
B016	GJ-tmp
B017	GJ-tmp
B018	GJ-trp
B019	XI-adm
B020	admix
B021	XI-adm
B023	GJ-tmp
B024	XI-1A
B025	GJ-trp
B026	XI-adm
B027	XI-3
B028	XI-adm
B029	XI-1B
B030	XI-adm
B031	XI-2
B032	XI-1B
B033	XI-1B
B034	GJ-tmp
B035	XI-adm
B036	GJ-adm
B037	GJ-trp
B038	GJ-tmp
B039	XI-adm
B040	XI-adm
B043	GJ-trp
B044	XI-adm
B045	GJ-tmp
B046	GJ-tmp
B047	GJ-tmp
B048	XI-1B
B049	cA (Aus)
B051	XI-adm
B052	XI-2
B053	GJ-trp
B054	GJ-trp
B055	GJ-tmp
B056	GJ-tmp
B057	GJ-tmp
B058	XI-1B
B059	XI-1A
B060	XI-1A
B061	XI-1A
B062	XI-1A
B063	XI-1A
B064	XI-adm
B065	XI-adm
B066	GJ-tmp
B067	XI-1A
B068	GJ-tmp
B069	GJ-adm
B070	GJ-adm
B071	GJ-tmp
B072	XI-1A
B073	XI-adm
B074	XI-1A
B075	XI-adm
B076	XI-adm
B077	GJ-tmp
B079	XI-1A
B081	XI-1A
B082	XI-adm
B083	XI-1A
B084	admix
B085	XI-1A
B086	admix
B087	XI-2
B088	XI-adm
B089	XI-adm
B090	XI-adm
B091	XI-adm
B092	XI-1A
B093	XI-1A
B094	XI-1A
B095	XI-adm
B096	XI-adm
B097	XI-adm
B100	GJ-tmp
B101	GJ-tmp
B102	GJ-tmp
B103	GJ-tmp
B104	XI-1A
B105	XI-adm
B106	XI-adm
B107	XI-adm
B108	XI-adm
B109	GJ-adm
B110	GJ-tmp
B111	GJ-tmp
B112	XI-1A
B113	XI-adm
B114	XI-1A
B115	XI-1A
B116	XI-adm
B117	GJ-tmp
B118	XI-adm
B119	XI-1A
B120	XI-adm
B121	XI-1A
B122	GJ-tmp
B123	XI-adm
B124	GJ-tmp
B125	XI-adm
B126	XI-1A
B127	XI-1A
B128	XI-adm
B129	XI-adm
B130	XI-1A
B131	XI-adm
B132	XI-adm
B133	XI-adm
B134	GJ-sbtrp
B135	XI-adm
B136	GJ-adm
B137	XI-adm
B138	XI-adm
B139	XI-adm
B140	XI-1A
B141	admix
B142	admix
B143	GJ-tmp
B144	GJ-adm
B145	XI-adm
B146	XI-1B
B147	XI-1A
B148	GJ-adm
B149	XI-1A
B150	XI-1A
B151	XI-1A
B152	GJ-tmp
B153	XI-adm
B154	GJ-tmp
B155	XI-adm
B156	XI-1A
B157	XI-1A
B158	admix
B159	XI-adm
B160	GJ-tmp
B161	GJ-tmp
B162	GJ-tmp
B163	XI-1A
B164	cA (Aus)
B165	XI-adm
B166	GJ-tmp
B167	GJ-tmp
B168	GJ-tmp
B169	GJ-tmp
B170	GJ-tmp
B171	GJ-tmp
B173	admix
B176	XI-adm
B179	GJ-tmp
B180	XI-adm
B181	XI-1A
B182	GJ-tmp
B183	GJ-tmp
B184	XI-adm
B185	XI-adm
B187	XI-adm
B188	GJ-trp
B189	GJ-trp
B190	GJ-trp
B191	GJ-trp
B192	admix
B193	XI-adm
B194	XI-1B
B195	XI-adm
B196	GJ-trp
B197	XI-1A
B198	XI-1A
B199	GJ-tmp
B200	XI-1B
B201	XI-1B
B202	XI-adm
B203	XI-adm
B204	GJ-tmp
B205	GJ-adm
B207	XI-adm
B208	XI-1A
B210	XI-1A
B212	GJ-tmp
B213	XI-1A
B214	XI-1B
B215	GJ-tmp
B216	XI-1A
B217	XI-1B
B218	GJ-tmp
B219	XI-adm
B221	XI-1A
B222	XI-1A
B223	GJ-tmp
B224	XI-1A
B225	GJ-tmp
B226	GJ-tmp
B227	XI-adm
B228	GJ-adm
B229	XI-adm
B230	GJ-adm
B231	XI-adm
B232	XI-1B
B233	XI-adm
B234	XI-1A
B235	GJ-tmp
B236	GJ-tmp
B238	XI-adm
B239	XI-1A
B240	GJ-tmp
B241	GJ-sbtrp
B242	XI-adm
B243	cA (Aus)
B244	XI-1A
B245	GJ-sbtrp
B246	XI-adm
B247	XI-adm
B248	XI-1A
B249	XI-1A
B250	GJ-tmp
B252	XI-adm
B253	XI-adm
B254	XI-adm
B255	XI-adm
B258	GJ-tmp
B259	XI-1A
B260	XI-1A
B261	XI-1A
B263	GJ-tmp
B264	XI-1A
B265	XI-adm
B266	GJ-sbtrp
B267	XI-adm
B268	XI-adm
B269	GJ-tmp
CX10	XI-1A
CX100	XI-1B
CX101	XI-1A
CX102	XI-1A
CX103	admix
CX104	cB (Bas)
CX106	GJ-trp
CX107	XI-3
CX108	admix
CX109	GJ-adm
CX11	GJ-adm
CX110	cB (Bas)
CX111	GJ-trp
CX112	admix
CX113	GJ-trp
CX114	XI-1A
CX115	XI-adm
CX116	GJ-tmp
CX117	XI-adm
CX118	XI-adm
CX119	XI-adm
CX12	XI-adm
CX120	XI-adm
CX121	XI-1B
CX122	XI-adm
CX123	XI-1A
CX124	XI-adm
CX125	XI-1B
CX126	XI-1B
CX128	XI-adm
CX129	GJ-trp
CX13	XI-adm
CX130	XI-2
CX131	XI-1A
CX132	GJ-trp
CX133	XI-1A
CX134	XI-1B
CX138	GJ-adm
CX139	GJ-adm
CX14	GJ-tmp
CX140	GJ-tmp
CX141	XI-3
CX142	GJ-adm
CX143	cB (Bas)
CX144	XI-adm
CX145	XI-adm
CX146	XI-adm
CX147	XI-adm
CX148	XI-3
CX149	cB (Bas)
CX15	XI-1B
CX150	XI-1B
CX151	GJ-trp
CX152	XI-1B
CX153	XI-2
CX154	XI-3
CX155	XI-2
CX156	XI-adm
CX157	XI-adm
CX158	XI-3
CX16	GJ-tmp
CX160	XI-2
CX161	XI-1B
CX162	XI-1A
CX165	GJ-tmp
CX17	XI-adm
CX18	XI-1A
CX182	XI-adm
CX19	XI-adm
CX2	XI-adm
CX20	XI-adm
CX205	GJ-adm
CX206	XI-1B
CX207	XI-adm
CX21	XI-1B
CX210	admix
CX211	GJ-tmp
CX212	GJ-tmp
CX213	GJ-tmp
CX214	GJ-trp
CX218	XI-1B
CX219	XI-adm
CX22	XI-1B
CX220	GJ-trp
CX221	XI-adm
CX225	XI-1B
CX226	XI-1B
CX227	cA (Aus)
CX228	XI-adm
CX23	XI-3
CX230	XI-1B
CX231	XI-adm
CX232	XI-adm
CX233	XI-adm
CX234	XI-adm
CX235	XI-adm
CX236	XI-adm
CX237	XI-1B
CX238	XI-1B
CX24	XI-adm
CX240	XI-adm
CX241	GJ-trp
CX242	admix
CX243	GJ-trp
CX247	XI-adm
CX248	GJ-trp
CX249	XI-1B
CX25	XI-1B
CX250	XI-1B
CX251	GJ-tmp
CX26	XI-1B
CX262	GJ-trp
CX263	XI-adm
CX265	XI-adm
CX266	GJ-trp
CX267	XI-adm
CX268	XI-adm
CX269	GJ-trp
CX27	XI-adm
CX270	XI-1A
CX273	XI-adm
CX274	XI-adm
CX275	XI-adm
CX276	XI-1B
CX277	GJ-adm
CX278	XI-adm
CX28	XI-1B
CX280	admix
CX281	XI-1B
CX282	GJ-adm
CX284	GJ-adm
CX285	GJ-trp
CX286	admix
CX287	GJ-tmp
CX288	XI-adm
CX29	admix
CX290	XI-1B
CX291	XI-adm
CX296	XI-adm
CX3	XI-1A
CX30	XI-1B
CX303	XI-adm
CX304	XI-adm
CX305	XI-1B
CX306	GJ-tmp
CX307	GJ-adm
CX31	XI-1B
CX313	XI-adm
CX314	XI-1B
CX315	GJ-tmp
CX316	admix
CX317	GJ-tmp
CX318	XI-adm
CX319	XI-adm
CX32	GJ-adm
CX328	XI-1A
CX329	GJ-tmp
CX33	XI-1B
CX330	GJ-tmp
CX34	XI-adm
CX340	XI-1B
CX341	XI-adm
CX342	XI-adm
CX343	XI-adm
CX344	GJ-tmp
CX345	GJ-tmp
CX346	XI-adm
CX347	XI-adm
CX348	XI-1B
CX349	XI-adm
CX35	XI-adm
CX350	GJ-tmp
CX351	GJ-tmp
CX352	GJ-trp
CX353	GJ-adm
CX354	GJ-adm
CX355	GJ-trp
CX356	GJ-tmp
CX357	XI-1B
CX358	XI-1B
CX359	GJ-trp
CX360	XI-1B
CX361	XI-1B
CX362	XI-1B
CX363	XI-adm
CX364	XI-1B
CX365	admix
CX366	XI-adm
CX367	GJ-trp
CX368	cA (Aus)
CX369	XI-1B
CX37	XI-1B
CX370	XI-1B
CX371	GJ-trp
CX372	GJ-trp
CX373	GJ-trp
CX374	GJ-trp
CX375	XI-1B
CX376	XI-1B
CX377	XI-1B
CX378	XI-1B
CX379	XI-1B
CX380	GJ-tmp
CX381	XI-1B
CX382	XI-1B
CX383	GJ-tmp
CX384	GJ-tmp
CX385	XI-1B
CX386	XI-adm
CX387	XI-1B
CX388	XI-1B
CX389	GJ-tmp
CX390	XI-adm
CX391	GJ-tmp
CX392	XI-adm
CX393	XI-1B
CX394	XI-1B
CX395	admix
CX396	GJ-tmp
CX397	GJ-tmp
CX399	XI-1B
CX4	XI-adm
CX400	admix
CX401	XI-adm
CX402	admix
CX403	XI-1B
CX408	XI-1B
CX409	XI-1B
CX410	XI-1B
CX411	XI-1B
CX413	XI-1B
CX414	XI-1B
CX416	XI-1B
CX417	XI-1B
CX418	XI-1B
CX419	XI-1B
CX42	XI-adm
CX420	XI-1B
CX421	XI-1B
CX422	XI-1B
CX423	XI-1B
CX424	XI-1B
CX425	XI-1B
CX426	XI-1B
CX427	GJ-tmp
CX428	GJ-tmp
CX429	GJ-tmp
CX43	XI-1B
CX431	XI-adm
CX44	XI-1B
CX45	XI-1B
CX46	admix
CX47	GJ-tmp
CX48	XI-adm
CX49	GJ-tmp
CX5	XI-adm
CX50	XI-1B
CX51	XI-adm
CX52	XI-adm
CX53	XI-adm
CX534	GJ-tmp
CX54	XI-adm
CX542	XI-adm
CX548	XI-adm
CX55	XI-1A
CX56	GJ-tmp
CX561	XI-1B
CX57	GJ-tmp
CX578	GJ-tmp
CX579	admix
CX58	GJ-tmp
CX59	cB (Bas)
CX6	admix
CX60	XI-1B
CX61	XI-1A
CX63	cA (Aus)
CX64	XI-3
CX65	cB (Bas)
CX66	cB (Bas)
CX67	cB (Bas)
CX68	XI-adm
CX69	XI-adm
CX70	XI-adm
CX71	XI-3
CX72	cB (Bas)
CX73	XI-1B
CX74	GJ-tmp
CX75	XI-adm
CX76	XI-1B
CX77	GJ-trp
CX78	GJ-tmp
CX79	XI-1B
CX8	XI-adm
CX80	XI-1B
CX82	XI-1B
CX83	XI-1B
CX84	XI-adm
CX85	XI-adm
CX86	XI-adm
CX87	XI-adm
CX88	XI-1A
CX89	XI-adm
CX9	XI-1B
CX90	XI-1B
CX91	XI-1B
CX92	XI-1B
CX93	XI-adm
CX94	XI-adm
CX96	XI-1B
CX97	XI-1B
CX98	XI-2
CX99	XI-2
IRIS_313-10000	XI-1B
IRIS_313-10001	XI-1B
IRIS_313-10002	XI-1B
IRIS_313-10007	XI-adm
IRIS_313-10010	XI-2
IRIS_313-10014	GJ-tmp
IRIS_313-10016	XI-adm
IRIS_313-10020	cA (Aus)
IRIS_313-10025	admix
IRIS_313-10026	XI-2
IRIS_313-10030	XI-2
IRIS_313-10032	cB (Bas)
IRIS_313-10034	XI-adm
IRIS_313-10035	XI-2
IRIS_313-10040	XI-1B
IRIS_313-10041	GJ-trp
IRIS_313-10045	XI-adm
IRIS_313-10046	XI-1B
IRIS_313-10047	XI-1A
IRIS_313-10048	XI-adm
IRIS_313-10050	XI-adm
IRIS_313-10051	GJ-trp
IRIS_313-10054	XI-adm
IRIS_313-10056	GJ-sbtrp
IRIS_313-10057	GJ-tmp
IRIS_313-10059	GJ-tmp
IRIS_313-10061	GJ-adm
IRIS_313-10062	GJ-trp
IRIS_313-10065	GJ-trp
IRIS_313-10067	GJ-trp
IRIS_313-10071	GJ-trp
IRIS_313-10073	GJ-trp
IRIS_313-10074	GJ-trp
IRIS_313-10075	GJ-trp
IRIS_313-10076	GJ-trp
IRIS_313-10077	XI-adm
IRIS_313-10078	GJ-trp
IRIS_313-10079	GJ-trp
IRIS_313-10080	GJ-trp
IRIS_313-10082	GJ-trp
IRIS_313-10083	GJ-tmp
IRIS_313-10084	GJ-tmp
IRIS_313-10089	GJ-tmp
IRIS_313-10092	GJ-tmp
IRIS_313-10093	GJ-tmp
IRIS_313-10094	GJ-trp
IRIS_313-10096	GJ-adm
IRIS_313-10097	GJ-tmp
IRIS_313-10099	GJ-trp
IRIS_313-10102	XI-2
IRIS_313-10103	XI-adm
IRIS_313-10109	XI-3
IRIS_313-10111	GJ-adm
IRIS_313-10113	XI-adm
IRIS_313-10114	XI-2
IRIS_313-10119	GJ-adm
IRIS_313-10124	GJ-tmp
IRIS_313-10129	XI-1A
IRIS_313-10134	XI-3
IRIS_313-10147	XI-3
IRIS_313-10148	XI-adm
IRIS_313-10150	cA (Aus)
IRIS_313-10151	XI-3
IRIS_313-10152	GJ-trp
IRIS_313-10154	XI-1A
IRIS_313-10158	XI-adm
IRIS_313-10161	XI-1B
IRIS_313-10164	GJ-tmp
IRIS_313-10167	XI-adm
IRIS_313-10168	XI-adm
IRIS_313-10170	XI-1A
IRIS_313-10171	XI-1A
IRIS_313-10176	GJ-sbtrp
IRIS_313-10177	XI-adm
IRIS_313-10178	XI-1A
IRIS_313-10179	XI-adm
IRIS_313-10189	XI-1A
IRIS_313-10190	XI-1A
IRIS_313-10191	XI-1A
IRIS_313-10196	GJ-trp
IRIS_313-10211	XI-1A
IRIS_313-10220	XI-adm
IRIS_313-10221	XI-adm
IRIS_313-10224	XI-1A
IRIS_313-10226	XI-adm
IRIS_313-10228	GJ-tmp
IRIS_313-10234	XI-1B
IRIS_313-10235	XI-adm
IRIS_313-10237	XI-1B
IRIS_313-10238	XI-1B
IRIS_313-10239	XI-adm
IRIS_313-10242	GJ-tmp
IRIS_313-10247	XI-1B
IRIS_313-10257	XI-adm
IRIS_313-10258	GJ-tmp
IRIS_313-10260	XI-adm
IRIS_313-10263	XI-adm
IRIS_313-10268	XI-adm
IRIS_313-10271	XI-adm
IRIS_313-10272	GJ-adm
IRIS_313-10274	XI-1B
IRIS_313-10275	XI-adm
IRIS_313-10279	XI-adm
IRIS_313-10285	XI-adm
IRIS_313-10287	XI-1B
IRIS_313-10289	XI-1B
IRIS_313-10290	XI-1B
IRIS_313-10293	XI-1B
IRIS_313-10294	XI-adm
IRIS_313-10295	admix
IRIS_313-10298	XI-1B
IRIS_313-10300	XI-adm
IRIS_313-10301	XI-adm
IRIS_313-10307	XI-adm
IRIS_313-10314	XI-adm
IRIS_313-10318	XI-adm
IRIS_313-10325	XI-adm
IRIS_313-10327	GJ-trp
IRIS_313-10332	XI-adm
IRIS_313-10333	XI-1B
IRIS_313-10334	XI-1B
IRIS_313-10336	GJ-trp
IRIS_313-10337	XI-adm
IRIS_313-10340	XI-adm
IRIS_313-10341	XI-adm
IRIS_313-10348	XI-adm
IRIS_313-10349	XI-adm
IRIS_313-10352	XI-adm
IRIS_313-10353	XI-adm
IRIS_313-10355	XI-adm
IRIS_313-10357	XI-adm
IRIS_313-10359	XI-adm
IRIS_313-10360	XI-adm
IRIS_313-10361	XI-adm
IRIS_313-10366	XI-adm
IRIS_313-10371	XI-adm
IRIS_313-10373	GJ-tmp
IRIS_313-10374	XI-adm
IRIS_313-10375	XI-adm
IRIS_313-10379	GJ-tmp
IRIS_313-10380	cA (Aus)
IRIS_313-10385	XI-1B
IRIS_313-10392	XI-1B
IRIS_313-10394	XI-adm
IRIS_313-10396	XI-adm
IRIS_313-10397	XI-1B
IRIS_313-10398	XI-1B
IRIS_313-10399	XI-adm
IRIS_313-10400	XI-1B
IRIS_313-10401	XI-1B
IRIS_313-10402	XI-1B
IRIS_313-10403	XI-adm
IRIS_313-10404	XI-adm
IRIS_313-10412	XI-adm
IRIS_313-10417	XI-1B
IRIS_313-10421	XI-adm
IRIS_313-10422	XI-adm
IRIS_313-10423	XI-adm
IRIS_313-10428	XI-3
IRIS_313-10429	GJ-tmp
IRIS_313-10430	GJ-tmp
IRIS_313-10433	XI-adm
IRIS_313-10437	GJ-tmp
IRIS_313-10440	GJ-tmp
IRIS_313-10441	XI-adm
IRIS_313-10444	GJ-trp
IRIS_313-10448	XI-3
IRIS_313-10449	XI-1A
IRIS_313-10450	XI-1A
IRIS_313-10452	XI-1A
IRIS_313-10453	GJ-adm
IRIS_313-10458	XI-1A
IRIS_313-10459	GJ-adm
IRIS_313-10469	GJ-tmp
IRIS_313-10476	XI-2
IRIS_313-10477	XI-adm
IRIS_313-10480	XI-adm
IRIS_313-10484	XI-1A
IRIS_313-10485	GJ-trp
IRIS_313-10489	GJ-trp
IRIS_313-10497	XI-1A
IRIS_313-10502	XI-1A
IRIS_313-10503	XI-1A
IRIS_313-10504	XI-1A
IRIS_313-10506	XI-3
IRIS_313-10507	GJ-trp
IRIS_313-10509	XI-3
IRIS_313-10510	XI-adm
IRIS_313-10511	XI-3
IRIS_313-10513	XI-adm
IRIS_313-10514	XI-adm
IRIS_313-10515	XI-1A
IRIS_313-10516	XI-adm
IRIS_313-10517	XI-3
IRIS_313-10518	XI-adm
IRIS_313-10519	XI-2
IRIS_313-10520	XI-adm
IRIS_313-10521	cB (Bas)
IRIS_313-10522	admix
IRIS_313-10523	XI-adm
IRIS_313-10524	XI-3
IRIS_313-10525	XI-3
IRIS_313-10526	XI-2
IRIS_313-10527	XI-2
IRIS_313-10531	admix
IRIS_313-10534	cA (Aus)
IRIS_313-10536	XI-2
IRIS_313-10537	admix
IRIS_313-10539	XI-2
IRIS_313-10541	GJ-trp
IRIS_313-10542	XI-2
IRIS_313-10543	cA (Aus)
IRIS_313-10544	XI-2
IRIS_313-10545	cA (Aus)
IRIS_313-10547	XI-adm
IRIS_313-10549	cA (Aus)
IRIS_313-10550	XI-adm
IRIS_313-10552	GJ-trp
IRIS_313-10554	XI-3
IRIS_313-10555	XI-3
IRIS_313-10556	XI-3
IRIS_313-10557	XI-3
IRIS_313-10558	GJ-tmp
IRIS_313-10559	GJ-tmp
IRIS_313-10560	XI-1A
IRIS_313-10561	XI-1A
IRIS_313-10562	GJ-adm
IRIS_313-10563	GJ-tmp
IRIS_313-10564	GJ-tmp
IRIS_313-10565	XI-adm
IRIS_313-10566	XI-adm
IRIS_313-10567	GJ-tmp
IRIS_313-10568	GJ-tmp
IRIS_313-10569	GJ-tmp
IRIS_313-10570	GJ-tmp
IRIS_313-10572	XI-adm
IRIS_313-10573	XI-2
IRIS_313-10574	XI-adm
IRIS_313-10575	XI-adm
IRIS_313-10576	XI-2
IRIS_313-10577	GJ-trp
IRIS_313-10578	GJ-trp
IRIS_313-10580	GJ-trp
IRIS_313-10581	GJ-trp
IRIS_313-10582	GJ-trp
IRIS_313-10583	GJ-tmp
IRIS_313-10585	admix
IRIS_313-10587	cA (Aus)
IRIS_313-10592	cA (Aus)
IRIS_313-10593	cA (Aus)
IRIS_313-10594	cA (Aus)
IRIS_313-10595	cA (Aus)
IRIS_313-10598	cA (Aus)
IRIS_313-10600	cA (Aus)
IRIS_313-10602	cA (Aus)
IRIS_313-10603	cA (Aus)
IRIS_313-10604	cA (Aus)
IRIS_313-10605	cA (Aus)
IRIS_313-10606	cA (Aus)
IRIS_313-10608	cA (Aus)
IRIS_313-10609	XI-adm
IRIS_313-10610	XI-2
IRIS_313-10614	XI-adm
IRIS_313-10617	GJ-tmp
IRIS_313-10618	GJ-tmp
IRIS_313-10619	GJ-trp
IRIS_313-10620	GJ-trp
IRIS_313-10623	cA (Aus)
IRIS_313-10628	XI-2
IRIS_313-10631	GJ-tmp
IRIS_313-10640	XI-2
IRIS_313-10642	GJ-tmp
IRIS_313-10644	GJ-trp
IRIS_313-10645	GJ-trp
IRIS_313-10648	XI-3
IRIS_313-10649	GJ-trp
IRIS_313-10650	XI-3
IRIS_313-10651	XI-adm
IRIS_313-10652	XI-3
IRIS_313-10653	GJ-sbtrp
IRIS_313-10654	XI-3
IRIS_313-10655	XI-adm
IRIS_313-10656	GJ-sbtrp
IRIS_313-10657	GJ-sbtrp
IRIS_313-10659	XI-3
IRIS_313-10660	GJ-sbtrp
IRIS_313-10661	XI-2
IRIS_313-10662	XI-2
IRIS_313-10664	XI-2
IRIS_313-10666	XI-adm
IRIS_313-10667	XI-2
IRIS_313-10668	XI-adm
IRIS_313-10670	cB (Bas)
IRIS_313-10671	XI-adm
IRIS_313-10673	cA (Aus)
IRIS_313-10674	XI-adm
IRIS_313-10675	XI-adm
IRIS_313-10676	admix
IRIS_313-10677	GJ-tmp
IRIS_313-10678	XI-2
IRIS_313-10679	GJ-sbtrp
IRIS_313-10680	XI-3
IRIS_313-10681	XI-3
IRIS_313-10682	XI-3
IRIS_313-10683	XI-3
IRIS_313-10684	XI-3
IRIS_313-10687	XI-3
IRIS_313-10688	XI-3
IRIS_313-10689	GJ-trp
IRIS_313-10690	XI-3
IRIS_313-10692	XI-3
IRIS_313-10693	GJ-trp
IRIS_313-10694	XI-3
IRIS_313-10695	XI-3
IRIS_313-10697	XI-3
IRIS_313-10698	XI-3
IRIS_313-10699	XI-3
IRIS_313-10700	XI-3
IRIS_313-10701	XI-3
IRIS_313-10702	XI-3
IRIS_313-10703	GJ-trp
IRIS_313-10704	GJ-trp
IRIS_313-10705	XI-adm
IRIS_313-10706	XI-3
IRIS_313-10707	XI-3
IRIS_313-10708	GJ-trp
IRIS_313-10710	GJ-trp
IRIS_313-10711	GJ-trp
IRIS_313-10712	GJ-trp
IRIS_313-10715	XI-2
IRIS_313-10716	XI-2
IRIS_313-10717	XI-2
IRIS_313-10718	cA (Aus)
IRIS_313-10719	XI-2
IRIS_313-10720	XI-adm
IRIS_313-10721	XI-2
IRIS_313-10722	GJ-trp
IRIS_313-10723	XI-2
IRIS_313-10724	XI-3
IRIS_313-10725	XI-adm
IRIS_313-10726	XI-3
IRIS_313-10727	XI-3
IRIS_313-10728	XI-adm
IRIS_313-10729	admix
IRIS_313-10730	GJ-trp
IRIS_313-10731	XI-1A
IRIS_313-10732	cB (Bas)
IRIS_313-10733	XI-adm
IRIS_313-10734	cA (Aus)
IRIS_313-10735	cA (Aus)
IRIS_313-10736	cA (Aus)
IRIS_313-10737	cA (Aus)
IRIS_313-10738	admix
IRIS_313-10739	XI-adm
IRIS_313-10740	GJ-trp
IRIS_313-10741	GJ-trp
IRIS_313-10742	XI-3
IRIS_313-10743	GJ-trp
IRIS_313-10744	GJ-trp
IRIS_313-10745	GJ-trp
IRIS_313-10746	GJ-trp
IRIS_313-10747	GJ-trp
IRIS_313-10748	XI-adm
IRIS_313-10749	XI-3
IRIS_313-10750	XI-3
IRIS_313-10751	XI-adm
IRIS_313-10752	GJ-trp
IRIS_313-10753	XI-1B
IRIS_313-10754	XI-adm
IRIS_313-10755	XI-3
IRIS_313-10756	XI-2
IRIS_313-10757	XI-3
IRIS_313-10758	GJ-trp
IRIS_313-10759	GJ-trp
IRIS_313-10760	XI-3
IRIS_313-10761	GJ-trp
IRIS_313-10762	XI-3
IRIS_313-10765	GJ-trp
IRIS_313-10766	GJ-trp
IRIS_313-10767	GJ-trp
IRIS_313-10768	XI-3
IRIS_313-10769	XI-adm
IRIS_313-10770	GJ-trp
IRIS_313-10771	GJ-trp
IRIS_313-10772	XI-3
IRIS_313-10773	GJ-trp
IRIS_313-10774	XI-adm
IRIS_313-10775	XI-adm
IRIS_313-10776	GJ-trp
IRIS_313-10777	XI-3
IRIS_313-10778	XI-3
IRIS_313-10779	XI-3
IRIS_313-10780	GJ-trp
IRIS_313-10781	GJ-trp
IRIS_313-10782	XI-3
IRIS_313-10783	GJ-trp
IRIS_313-10784	GJ-trp
IRIS_313-10785	GJ-trp
IRIS_313-10786	XI-3
IRIS_313-10787	XI-3
IRIS_313-10788	GJ-trp
IRIS_313-10789	GJ-trp
IRIS_313-10790	GJ-trp
IRIS_313-10791	XI-3
IRIS_313-10792	XI-3
IRIS_313-10793	GJ-trp
IRIS_313-10794	GJ-trp
IRIS_313-10795	GJ-trp
IRIS_313-10796	GJ-trp
IRIS_313-10797	XI-3
IRIS_313-10798	GJ-trp
IRIS_313-10799	GJ-trp
IRIS_313-10800	GJ-trp
IRIS_313-10801	GJ-trp
IRIS_313-10802	GJ-trp
IRIS_313-10803	GJ-trp
IRIS_313-10804	XI-3
IRIS_313-10805	GJ-trp
IRIS_313-10806	XI-3
IRIS_313-10807	XI-3
IRIS_313-10808	GJ-trp
IRIS_313-10809	GJ-trp
IRIS_313-10810	XI-3
IRIS_313-10811	XI-adm
IRIS_313-10812	XI-3
IRIS_313-10813	XI-3
IRIS_313-10814	XI-3
IRIS_313-10815	GJ-trp
IRIS_313-10816	GJ-trp
IRIS_313-10817	GJ-trp
IRIS_313-10818	XI-3
IRIS_313-10819	XI-3
IRIS_313-10820	XI-3
IRIS_313-10821	XI-3
IRIS_313-10822	XI-3
IRIS_313-10823	XI-3
IRIS_313-10824	XI-3
IRIS_313-10825	XI-adm
IRIS_313-10827	GJ-trp
IRIS_313-10828	GJ-trp
IRIS_313-10829	GJ-trp
IRIS_313-10830	GJ-trp
IRIS_313-10831	GJ-trp
IRIS_313-10832	GJ-trp
IRIS_313-10833	XI-2
IRIS_313-10834	GJ-sbtrp
IRIS_313-10835	XI-2
IRIS_313-10836	XI-2
IRIS_313-10837	GJ-tmp
IRIS_313-10838	GJ-tmp
IRIS_313-10839	GJ-tmp
IRIS_313-10840	GJ-tmp
IRIS_313-10841	GJ-trp
IRIS_313-10842	XI-3
IRIS_313-10844	XI-3
IRIS_313-10845	cA (Aus)
IRIS_313-10847	XI-adm
IRIS_313-10848	GJ-sbtrp
IRIS_313-10849	cA (Aus)
IRIS_313-10850	admix
IRIS_313-10851	cB (Bas)
IRIS_313-10852	cA (Aus)
IRIS_313-10853	GJ-adm
IRIS_313-10854	cA (Aus)
IRIS_313-10855	XI-2
IRIS_313-10856	admix
IRIS_313-10857	admix
IRIS_313-10858	XI-adm
IRIS_313-10859	XI-adm
IRIS_313-10861	cA (Aus)
IRIS_313-10862	GJ-adm
IRIS_313-10863	XI-2
IRIS_313-10864	admix
IRIS_313-10865	GJ-sbtrp
IRIS_313-10866	GJ-sbtrp
IRIS_313-10867	GJ-sbtrp
IRIS_313-10868	cB (Bas)
IRIS_313-10869	cA (Aus)
IRIS_313-10870	GJ-sbtrp
IRIS_313-10871	cA (Aus)
IRIS_313-10872	GJ-adm
IRIS_313-10873	cA (Aus)
IRIS_313-10874	GJ-sbtrp
IRIS_313-10875	cA (Aus)
IRIS_313-10876	cA (Aus)
IRIS_313-10877	cA (Aus)
IRIS_313-10878	cA (Aus)
IRIS_313-10879	admix
IRIS_313-10880	XI-2
IRIS_313-10881	admix
IRIS_313-10882	cA (Aus)
IRIS_313-10883	admix
IRIS_313-10884	GJ-sbtrp
IRIS_313-10885	XI-adm
IRIS_313-10886	GJ-sbtrp
IRIS_313-10887	XI-adm
IRIS_313-10888	GJ-sbtrp
IRIS_313-10889	GJ-sbtrp
IRIS_313-10890	GJ-sbtrp
IRIS_313-10891	cA (Aus)
IRIS_313-10892	cA (Aus)
IRIS_313-10893	GJ-sbtrp
IRIS_313-10894	admix
IRIS_313-10895	GJ-sbtrp
IRIS_313-10896	admix
IRIS_313-10897	XI-3
IRIS_313-10898	XI-3
IRIS_313-10899	XI-3
IRIS_313-10900	XI-3
IRIS_313-10901	XI-3
IRIS_313-10902	XI-3
IRIS_313-10903	XI-3
IRIS_313-10904	XI-3
IRIS_313-10905	XI-3
IRIS_313-10906	XI-3
IRIS_313-10907	XI-3
IRIS_313-10908	XI-3
IRIS_313-10909	XI-3
IRIS_313-10910	XI-3
IRIS_313-10911	XI-3
IRIS_313-10912	XI-3
IRIS_313-10913	XI-3
IRIS_313-10915	XI-3
IRIS_313-10916	GJ-tmp
IRIS_313-10917	XI-adm
IRIS_313-10918	GJ-trp
IRIS_313-10919	GJ-trp
IRIS_313-10920	GJ-trp
IRIS_313-10921	XI-adm
IRIS_313-10922	GJ-sbtrp
IRIS_313-10923	GJ-sbtrp
IRIS_313-10924	XI-adm
IRIS_313-10925	cA (Aus)
IRIS_313-10926	cB (Bas)
IRIS_313-10927	cA (Aus)
IRIS_313-10928	XI-3
IRIS_313-10929	XI-2
IRIS_313-10930	cA (Aus)
IRIS_313-10931	GJ-trp
IRIS_313-10932	XI-1A
IRIS_313-10933	cB (Bas)
IRIS_313-10934	XI-3
IRIS_313-10935	XI-3
IRIS_313-10936	GJ-trp
IRIS_313-10937	XI-3
IRIS_313-10938	XI-3
IRIS_313-10940	XI-3
IRIS_313-10941	XI-adm
IRIS_313-10942	XI-3
IRIS_313-10943	XI-3
IRIS_313-10944	XI-3
IRIS_313-10945	GJ-trp
IRIS_313-10946	GJ-trp
IRIS_313-10947	XI-3
IRIS_313-10948	admix
IRIS_313-10949	GJ-trp
IRIS_313-10950	GJ-trp
IRIS_313-10951	XI-3
IRIS_313-10952	GJ-trp
IRIS_313-10953	GJ-trp
IRIS_313-10954	XI-3
IRIS_313-10955	XI-3
IRIS_313-10956	GJ-trp
IRIS_313-10957	GJ-trp
IRIS_313-10958	GJ-trp
IRIS_313-10959	GJ-trp
IRIS_313-10960	GJ-trp
IRIS_313-10961	XI-3
IRIS_313-10962	XI-3
IRIS_313-10963	cA (Aus)
IRIS_313-10964	cA (Aus)
IRIS_313-10965	cA (Aus)
IRIS_313-10966	XI-adm
IRIS_313-10967	GJ-tmp
IRIS_313-10968	XI-1A
IRIS_313-10969	cA (Aus)
IRIS_313-10970	XI-3
IRIS_313-10971	XI-2
IRIS_313-10972	XI-2
IRIS_313-10973	XI-2
IRIS_313-10974	XI-2
IRIS_313-10975	XI-2
IRIS_313-10976	cA (Aus)
IRIS_313-10977	XI-2
IRIS_313-10978	XI-adm
IRIS_313-10979	cA (Aus)
IRIS_313-10980	admix
IRIS_313-10981	cA (Aus)
IRIS_313-10982	XI-2
IRIS_313-10983	XI-adm
IRIS_313-10984	XI-2
IRIS_313-10985	XI-2
IRIS_313-10986	XI-2
IRIS_313-10987	cA (Aus)
IRIS_313-10988	XI-adm
IRIS_313-10989	XI-2
IRIS_313-10990	XI-adm
IRIS_313-10991	GJ-trp
IRIS_313-10992	GJ-trp
IRIS_313-10993	GJ-trp
IRIS_313-10994	GJ-trp
IRIS_313-10995	XI-3
IRIS_313-10996	XI-adm
IRIS_313-10997	XI-3
IRIS_313-10998	XI-adm
IRIS_313-10999	GJ-trp
IRIS_313-11000	XI-3
IRIS_313-11001	GJ-trp
IRIS_313-11003	GJ-trp
IRIS_313-11004	GJ-trp
IRIS_313-11005	GJ-trp
IRIS_313-11006	XI-3
IRIS_313-11007	GJ-trp
IRIS_313-11008	GJ-trp
IRIS_313-11009	GJ-trp
IRIS_313-11010	XI-3
IRIS_313-11011	XI-adm
IRIS_313-11012	admix
IRIS_313-11013	cA (Aus)
IRIS_313-11014	cA (Aus)
IRIS_313-11015	cA (Aus)
IRIS_313-11016	cA (Aus)
IRIS_313-11017	cA (Aus)
IRIS_313-11018	cA (Aus)
IRIS_313-11019	cA (Aus)
IRIS_313-11020	cA (Aus)
IRIS_313-11021	cB (Bas)
IRIS_313-11022	cB (Bas)
IRIS_313-11023	cB (Bas)
IRIS_313-11024	cA (Aus)
IRIS_313-11025	cA (Aus)
IRIS_313-11026	cB (Bas)
IRIS_313-11027	cA (Aus)
IRIS_313-11028	cA (Aus)
IRIS_313-11029	cA (Aus)
IRIS_313-11030	cB (Bas)
IRIS_313-11031	cA (Aus)
IRIS_313-11032	cB (Bas)
IRIS_313-11033	admix
IRIS_313-11034	cA (Aus)
IRIS_313-11035	admix
IRIS_313-11036	cA (Aus)
IRIS_313-11037	cA (Aus)
IRIS_313-11038	XI-1A
IRIS_313-11039	XI-1A
IRIS_313-11040	XI-adm
IRIS_313-11041	XI-2
IRIS_313-11042	XI-adm
IRIS_313-11043	XI-3
IRIS_313-11044	GJ-trp
IRIS_313-11045	GJ-trp
IRIS_313-11046	GJ-trp
IRIS_313-11047	cA (Aus)
IRIS_313-11048	cA (Aus)
IRIS_313-11049	cA (Aus)
IRIS_313-11050	cA (Aus)
IRIS_313-11051	cA (Aus)
IRIS_313-11052	cA (Aus)
IRIS_313-11053	cA (Aus)
IRIS_313-11054	cA (Aus)
IRIS_313-11055	cA (Aus)
IRIS_313-11056	cA (Aus)
IRIS_313-11057	cA (Aus)
IRIS_313-11058	cA (Aus)
IRIS_313-11059	cA (Aus)
IRIS_313-11060	cA (Aus)
IRIS_313-11061	cA (Aus)
IRIS_313-11062	cB (Bas)
IRIS_313-11063	cA (Aus)
IRIS_313-11064	cA (Aus)
IRIS_313-11065	cA (Aus)
IRIS_313-11066	admix
IRIS_313-11067	cA (Aus)
IRIS_313-11068	cB (Bas)
IRIS_313-11069	cB (Bas)
IRIS_313-11070	admix
IRIS_313-11071	XI-adm
IRIS_313-11072	XI-3
IRIS_313-11073	GJ-sbtrp
IRIS_313-11074	XI-3
IRIS_313-11075	GJ-adm
IRIS_313-11076	XI-3
IRIS_313-11077	GJ-sbtrp
IRIS_313-11078	XI-adm
IRIS_313-11079	XI-3
IRIS_313-11080	XI-3
IRIS_313-11081	XI-3
IRIS_313-11082	XI-3
IRIS_313-11083	XI-3
IRIS_313-11084	XI-3
IRIS_313-11085	XI-adm
IRIS_313-11086	XI-3
IRIS_313-11087	XI-3
IRIS_313-11088	XI-3
IRIS_313-11089	XI-3
IRIS_313-11090	XI-3
IRIS_313-11091	XI-adm
IRIS_313-11092	admix
IRIS_313-11093	GJ-sbtrp
IRIS_313-11094	GJ-sbtrp
IRIS_313-11095	XI-3
IRIS_313-11096	XI-3
IRIS_313-11097	XI-adm
IRIS_313-11098	XI-3
IRIS_313-11099	XI-2
IRIS_313-11100	GJ-trp
IRIS_313-11101	XI-adm
IRIS_313-11102	GJ-trp
IRIS_313-11103	GJ-trp
IRIS_313-11104	GJ-trp
IRIS_313-11105	GJ-trp
IRIS_313-11106	GJ-trp
IRIS_313-11107	GJ-trp
IRIS_313-11108	XI-3
IRIS_313-11109	GJ-trp
IRIS_313-11110	XI-2
IRIS_313-11111	cA (Aus)
IRIS_313-11112	cA (Aus)
IRIS_313-11113	XI-2
IRIS_313-11114	XI-2
IRIS_313-11115	XI-2
IRIS_313-11116	cA (Aus)
IRIS_313-11117	GJ-trp
IRIS_313-11118	XI-3
IRIS_313-11119	XI-adm
IRIS_313-11120	XI-2
IRIS_313-11121	GJ-trp
IRIS_313-11122	XI-1B
IRIS_313-11123	cA (Aus)
IRIS_313-11124	admix
IRIS_313-11125	admix
IRIS_313-11126	XI-adm
IRIS_313-11127	GJ-sbtrp
IRIS_313-11128	XI-adm
IRIS_313-11129	XI-adm
IRIS_313-11130	XI-adm
IRIS_313-11131	XI-adm
IRIS_313-11132	XI-adm
IRIS_313-11133	XI-3
IRIS_313-11134	XI-adm
IRIS_313-11135	XI-3
IRIS_313-11136	admix
IRIS_313-11137	XI-adm
IRIS_313-11138	XI-3
IRIS_313-11139	XI-adm
IRIS_313-11140	XI-3
IRIS_313-11141	XI-adm
IRIS_313-11142	XI-3
IRIS_313-11143	XI-adm
IRIS_313-11144	XI-adm
IRIS_313-11145	XI-3
IRIS_313-11146	XI-adm
IRIS_313-11147	XI-adm
IRIS_313-11148	XI-3
IRIS_313-11149	XI-3
IRIS_313-11150	XI-3
IRIS_313-11151	XI-3
IRIS_313-11152	XI-1A
IRIS_313-11153	GJ-tmp
IRIS_313-11154	cA (Aus)
IRIS_313-11155	GJ-tmp
IRIS_313-11156	GJ-adm
IRIS_313-11157	XI-1A
IRIS_313-11158	XI-1A
IRIS_313-11159	GJ-trp
IRIS_313-11160	XI-3
IRIS_313-11161	GJ-trp
IRIS_313-11162	XI-1B
IRIS_313-11163	cA (Aus)
IRIS_313-11164	cA (Aus)
IRIS_313-11165	cA (Aus)
IRIS_313-11166	cA (Aus)
IRIS_313-11167	XI-2
IRIS_313-11168	cA (Aus)
IRIS_313-11169	cA (Aus)
IRIS_313-11170	cA (Aus)
IRIS_313-11171	cA (Aus)
IRIS_313-11172	cA (Aus)
IRIS_313-11173	cA (Aus)
IRIS_313-11174	cA (Aus)
IRIS_313-11175	cA (Aus)
IRIS_313-11176	XI-adm
IRIS_313-11177	XI-adm
IRIS_313-11178	XI-3
IRIS_313-11179	XI-3
IRIS_313-11180	XI-3
IRIS_313-11181	XI-3
IRIS_313-11182	XI-3
IRIS_313-11183	GJ-trp
IRIS_313-11189	admix
IRIS_313-11191	cA (Aus)
IRIS_313-11192	XI-3
IRIS_313-11193	XI-3
IRIS_313-11194	XI-3
IRIS_313-11195	GJ-sbtrp
IRIS_313-11196	XI-3
IRIS_313-11197	XI-adm
IRIS_313-11198	GJ-tmp
IRIS_313-11199	XI-adm
IRIS_313-11200	XI-1B
IRIS_313-11201	GJ-tmp
IRIS_313-11202	GJ-tmp
IRIS_313-11203	XI-2
IRIS_313-11204	XI-adm
IRIS_313-11205	XI-2
IRIS_313-11206	XI-adm
IRIS_313-11207	XI-2
IRIS_313-11208	XI-adm
IRIS_313-11209	XI-2
IRIS_313-11210	cA (Aus)
IRIS_313-11211	XI-2
IRIS_313-11212	XI-2
IRIS_313-11213	cA (Aus)
IRIS_313-11214	cA (Aus)
IRIS_313-11216	cA (Aus)
IRIS_313-11217	cB (Bas)
IRIS_313-11218	cB (Bas)
IRIS_313-11219	XI-2
IRIS_313-11220	XI-2
IRIS_313-11221	XI-2
IRIS_313-11222	XI-2
IRIS_313-11223	cB (Bas)
IRIS_313-11224	XI-2
IRIS_313-11225	XI-adm
IRIS_313-11226	XI-2
IRIS_313-11227	XI-2
IRIS_313-11228	XI-2
IRIS_313-11229	XI-2
IRIS_313-11230	XI-2
IRIS_313-11231	XI-2
IRIS_313-11232	cA (Aus)
IRIS_313-11233	XI-1B
IRIS_313-11234	XI-adm
IRIS_313-11235	XI-adm
IRIS_313-11236	XI-3
IRIS_313-11237	XI-1B
IRIS_313-11238	GJ-trp
IRIS_313-11239	XI-adm
IRIS_313-11240	XI-adm
IRIS_313-11241	XI-2
IRIS_313-11242	XI-2
IRIS_313-11243	admix
IRIS_313-11244	XI-adm
IRIS_313-11245	XI-adm
IRIS_313-11246	GJ-tmp
IRIS_313-11247	XI-adm
IRIS_313-11248	GJ-trp
IRIS_313-11249	XI-adm
IRIS_313-11250	XI-1B
IRIS_313-11251	XI-1B
IRIS_313-11252	XI-adm
IRIS_313-11253	XI-adm
IRIS_313-11254	XI-3
IRIS_313-11255	XI-adm
IRIS_313-11256	XI-adm
IRIS_313-11257	XI-adm
IRIS_313-11258	cB (Bas)
IRIS_313-11259	cB (Bas)
IRIS_313-11260	XI-adm
IRIS_313-11261	XI-adm
IRIS_313-11262	XI-adm
IRIS_313-11263	XI-adm
IRIS_313-11264	XI-adm
IRIS_313-11265	cA (Aus)
IRIS_313-11266	XI-adm
IRIS_313-11267	XI-2
IRIS_313-11268	cB (Bas)
IRIS_313-11269	XI-adm
IRIS_313-11270	cB (Bas)
IRIS_313-11271	XI-2
IRIS_313-11272	cA (Aus)
IRIS_313-11273	XI-adm
IRIS_313-11274	cA (Aus)
IRIS_313-11275	XI-adm
IRIS_313-11276	XI-adm
IRIS_313-11277	cA (Aus)
IRIS_313-11278	XI-adm
IRIS_313-11279	XI-adm
IRIS_313-11280	XI-adm
IRIS_313-11281	XI-1A
IRIS_313-11282	XI-2
IRIS_313-11283	XI-adm
IRIS_313-11284	XI-adm
IRIS_313-11285	XI-2
IRIS_313-11286	XI-adm
IRIS_313-11287	XI-adm
IRIS_313-11288	XI-adm
IRIS_313-11289	cB (Bas)
IRIS_313-11290	admix
IRIS_313-11291	cA (Aus)
IRIS_313-11292	XI-adm
IRIS_313-11293	cB (Bas)
IRIS_313-11294	XI-2
IRIS_313-11295	admix
IRIS_313-11296	XI-adm
IRIS_313-11297	admix
IRIS_313-11298	cA (Aus)
IRIS_313-11299	XI-adm
IRIS_313-11300	XI-2
IRIS_313-11301	XI-2
IRIS_313-11302	XI-adm
IRIS_313-11303	XI-adm
IRIS_313-11304	XI-adm
IRIS_313-11305	XI-adm
IRIS_313-11306	XI-adm
IRIS_313-11307	XI-adm
IRIS_313-11308	XI-2
IRIS_313-11309	XI-adm
IRIS_313-11310	XI-2
IRIS_313-11311	GJ-trp
IRIS_313-11312	XI-3
IRIS_313-11313	GJ-trp
IRIS_313-11314	GJ-trp
IRIS_313-11315	XI-3
IRIS_313-11316	XI-3
IRIS_313-11317	XI-3
IRIS_313-11318	XI-3
IRIS_313-11319	XI-3
IRIS_313-11320	XI-3
IRIS_313-11321	XI-2
IRIS_313-11322	cA (Aus)
IRIS_313-11323	cA (Aus)
IRIS_313-11324	cA (Aus)
IRIS_313-11325	XI-adm
IRIS_313-11326	XI-adm
IRIS_313-11327	XI-3
IRIS_313-11328	GJ-trp
IRIS_313-11329	GJ-trp
IRIS_313-11330	XI-3
IRIS_313-11331	XI-3
IRIS_313-11334	XI-3
IRIS_313-11335	XI-2
IRIS_313-11336	GJ-tmp
IRIS_313-11337	GJ-trp
IRIS_313-11338	XI-adm
IRIS_313-11339	XI-2
IRIS_313-11340	GJ-trp
IRIS_313-11341	XI-3
IRIS_313-11342	XI-adm
IRIS_313-11343	XI-3
IRIS_313-11344	XI-3
IRIS_313-11345	XI-adm
IRIS_313-11346	XI-1B
IRIS_313-11347	XI-adm
IRIS_313-11348	cA (Aus)
IRIS_313-11349	XI-2
IRIS_313-11350	cB (Bas)
IRIS_313-11351	XI-2
IRIS_313-11352	cB (Bas)
IRIS_313-11353	cA (Aus)
IRIS_313-11354	XI-2
IRIS_313-11355	XI-adm
IRIS_313-11356	cB (Bas)
IRIS_313-11357	XI-1B
IRIS_313-11358	XI-2
IRIS_313-11359	XI-2
IRIS_313-11360	cB (Bas)
IRIS_313-11361	XI-2
IRIS_313-11362	cB (Bas)
IRIS_313-11363	XI-2
IRIS_313-11364	XI-adm
IRIS_313-11365	XI-adm
IRIS_313-11367	XI-2
IRIS_313-11368	XI-2
IRIS_313-11369	XI-2
IRIS_313-11370	XI-2
IRIS_313-11371	cA (Aus)
IRIS_313-11372	XI-2
IRIS_313-11373	cB (Bas)
IRIS_313-11374	cA (Aus)
IRIS_313-11375	cB (Bas)
IRIS_313-11376	GJ-trp
IRIS_313-11377	XI-adm
IRIS_313-11379	GJ-trp
IRIS_313-11380	GJ-trp
IRIS_313-11381	XI-3
IRIS_313-11382	XI-adm
IRIS_313-11383	XI-adm
IRIS_313-11384	XI-adm
IRIS_313-11385	XI-adm
IRIS_313-11386	XI-3
IRIS_313-11387	XI-3
IRIS_313-11388	XI-3
IRIS_313-11389	XI-3
IRIS_313-11390	XI-3
IRIS_313-11391	XI-3
IRIS_313-11392	XI-3
IRIS_313-11393	XI-3
IRIS_313-11394	XI-adm
IRIS_313-11395	XI-3
IRIS_313-11396	GJ-trp
IRIS_313-11397	GJ-trp
IRIS_313-11398	XI-3
IRIS_313-11399	XI-adm
IRIS_313-11400	XI-adm
IRIS_313-11401	cB (Bas)
IRIS_313-11402	XI-adm
IRIS_313-11403	XI-adm
IRIS_313-11404	XI-2
IRIS_313-11405	XI-3
IRIS_313-11406	XI-3
IRIS_313-11407	XI-2
IRIS_313-11408	XI-2
IRIS_313-11409	XI-2
IRIS_313-11410	XI-adm
IRIS_313-11411	XI-2
IRIS_313-11413	cA (Aus)
IRIS_313-11414	XI-adm
IRIS_313-11415	admix
IRIS_313-11416	XI-2
IRIS_313-11417	admix
IRIS_313-11418	XI-2
IRIS_313-11419	XI-adm
IRIS_313-11420	XI-2
IRIS_313-11421	XI-2
IRIS_313-11422	XI-1A
IRIS_313-11423	XI-adm
IRIS_313-11424	GJ-trp
IRIS_313-11425	admix
IRIS_313-11426	GJ-trp
IRIS_313-11427	GJ-trp
IRIS_313-11428	GJ-trp
IRIS_313-11429	GJ-trp
IRIS_313-11431	XI-3
IRIS_313-11432	admix
IRIS_313-11433	XI-1A
IRIS_313-11434	GJ-trp
IRIS_313-11435	GJ-trp
IRIS_313-11436	GJ-trp
IRIS_313-11437	XI-1B
IRIS_313-11438	XI-adm
IRIS_313-11439	GJ-trp
IRIS_313-11441	GJ-trp
IRIS_313-11442	XI-adm
IRIS_313-11443	XI-adm
IRIS_313-11445	XI-2
IRIS_313-11446	XI-2
IRIS_313-11447	XI-adm
IRIS_313-11448	XI-2
IRIS_313-11449	XI-adm
IRIS_313-11451	cB (Bas)
IRIS_313-11452	cA (Aus)
IRIS_313-11453	XI-2
IRIS_313-11454	cA (Aus)
IRIS_313-11455	cA (Aus)
IRIS_313-11456	cA (Aus)
IRIS_313-11458	cA (Aus)
IRIS_313-11460	XI-2
IRIS_313-11461	XI-2
IRIS_313-11462	cA (Aus)
IRIS_313-11463	XI-adm
IRIS_313-11464	GJ-trp
IRIS_313-11465	GJ-trp
IRIS_313-11467	XI-3
IRIS_313-11471	XI-adm
IRIS_313-11472	XI-3
IRIS_313-11473	GJ-trp
IRIS_313-11476	cA (Aus)
IRIS_313-11477	cA (Aus)
IRIS_313-11478	XI-2
IRIS_313-11479	GJ-trp
IRIS_313-11480	XI-1B
IRIS_313-11481	cA (Aus)
IRIS_313-11482	cA (Aus)
IRIS_313-11483	cA (Aus)
IRIS_313-11484	cA (Aus)
IRIS_313-11485	XI-3
IRIS_313-11486	admix
IRIS_313-11487	XI-2
IRIS_313-11489	cA (Aus)
IRIS_313-11490	XI-adm
IRIS_313-11491	XI-2
IRIS_313-11492	cA (Aus)
IRIS_313-11493	XI-adm
IRIS_313-11494	GJ-sbtrp
IRIS_313-11495	GJ-trp
IRIS_313-11496	GJ-trp
IRIS_313-11497	XI-2
IRIS_313-11498	GJ-trp
IRIS_313-11499	GJ-trp
IRIS_313-11500	XI-2
IRIS_313-11505	XI-2
IRIS_313-11506	XI-adm
IRIS_313-11507	XI-1B
IRIS_313-11508	XI-3
IRIS_313-11509	XI-3
IRIS_313-11510	XI-adm
IRIS_313-11511	GJ-trp
IRIS_313-11512	XI-adm
IRIS_313-11513	XI-1B
IRIS_313-11515	XI-adm
IRIS_313-11516	XI-adm
IRIS_313-11517	XI-1B
IRIS_313-11521	XI-adm
IRIS_313-11522	GJ-adm
IRIS_313-11523	XI-adm
IRIS_313-11524	GJ-trp
IRIS_313-11525	XI-3
IRIS_313-11526	GJ-trp
IRIS_313-11527	GJ-trp
IRIS_313-11528	XI-3
IRIS_313-11530	XI-3
IRIS_313-11532	GJ-trp
IRIS_313-11534	XI-3
IRIS_313-11535	XI-3
IRIS_313-11536	GJ-tmp
IRIS_313-11537	GJ-trp
IRIS_313-11538	XI-1B
IRIS_313-11539	GJ-trp
IRIS_313-11540	GJ-trp
IRIS_313-11541	XI-adm
IRIS_313-11542	admix
IRIS_313-11543	XI-3
IRIS_313-11544	XI-adm
IRIS_313-11545	XI-adm
IRIS_313-11546	XI-adm
IRIS_313-11547	XI-adm
IRIS_313-11548	XI-adm
IRIS_313-11549	XI-adm
IRIS_313-11551	XI-3
IRIS_313-11554	XI-3
IRIS_313-11555	XI-adm
IRIS_313-11556	XI-3
IRIS_313-11557	cA (Aus)
IRIS_313-11558	XI-2
IRIS_313-11561	XI-2
IRIS_313-11563	XI-2
IRIS_313-11564	cB (Bas)
IRIS_313-11565	XI-2
IRIS_313-11566	XI-2
IRIS_313-11567	cB (Bas)
IRIS_313-11568	XI-1A
IRIS_313-11570	XI-adm
IRIS_313-11571	GJ-tmp
IRIS_313-11572	XI-1A
IRIS_313-11573	XI-adm
IRIS_313-11574	GJ-tmp
IRIS_313-11575	GJ-tmp
IRIS_313-11576	XI-adm
IRIS_313-11577	XI-1A
IRIS_313-11578	GJ-tmp
IRIS_313-11579	XI-1A
IRIS_313-11580	XI-adm
IRIS_313-11582	GJ-tmp
IRIS_313-11584	GJ-tmp
IRIS_313-11585	XI-1A
IRIS_313-11586	GJ-tmp
IRIS_313-11588	XI-3
IRIS_313-11591	admix
IRIS_313-11594	XI-adm
IRIS_313-11595	cA (Aus)
IRIS_313-11596	XI-adm
IRIS_313-11597	XI-2
IRIS_313-11598	admix
IRIS_313-11599	XI-2
IRIS_313-11600	XI-2
IRIS_313-11602	cA (Aus)
IRIS_313-11603	cA (Aus)
IRIS_313-11604	cA (Aus)
IRIS_313-11606	XI-2
IRIS_313-11607	XI-2
IRIS_313-11608	XI-3
IRIS_313-11609	XI-3
IRIS_313-11610	XI-3
IRIS_313-11611	GJ-trp
IRIS_313-11615	XI-3
IRIS_313-11616	admix
IRIS_313-11617	cA (Aus)
IRIS_313-11618	cA (Aus)
IRIS_313-11619	cA (Aus)
IRIS_313-11620	cA (Aus)
IRIS_313-11621	XI-adm
IRIS_313-11622	XI-1A
IRIS_313-11623	GJ-sbtrp
IRIS_313-11624	XI-1A
IRIS_313-11625	cB (Bas)
IRIS_313-11626	cB (Bas)
IRIS_313-11627	cB (Bas)
IRIS_313-11628	admix
IRIS_313-11629	cA (Aus)
IRIS_313-11630	cB (Bas)
IRIS_313-11632	cB (Bas)
IRIS_313-11635	XI-3
IRIS_313-11636	cA (Aus)
IRIS_313-11638	XI-2
IRIS_313-11639	XI-adm
IRIS_313-11640	XI-2
IRIS_313-11641	XI-2
IRIS_313-11642	XI-2
IRIS_313-11643	XI-1B
IRIS_313-11644	XI-2
IRIS_313-11645	XI-2
IRIS_313-11646	XI-2
IRIS_313-11647	XI-2
IRIS_313-11648	XI-2
IRIS_313-11650	XI-2
IRIS_313-11651	GJ-tmp
IRIS_313-11652	GJ-tmp
IRIS_313-11653	GJ-tmp
IRIS_313-11654	GJ-tmp
IRIS_313-11655	GJ-tmp
IRIS_313-11656	XI-adm
IRIS_313-11657	XI-2
IRIS_313-11658	GJ-trp
IRIS_313-11659	GJ-trp
IRIS_313-11660	GJ-trp
IRIS_313-11661	GJ-tmp
IRIS_313-11663	admix
IRIS_313-11664	XI-adm
IRIS_313-11665	XI-1A
IRIS_313-11666	XI-adm
IRIS_313-11667	XI-1A
IRIS_313-11668	XI-1A
IRIS_313-11669	XI-adm
IRIS_313-11671	XI-2
IRIS_313-11672	GJ-tmp
IRIS_313-11673	GJ-trp
IRIS_313-11674	XI-3
IRIS_313-11676	XI-3
IRIS_313-11677	XI-3
IRIS_313-11678	XI-3
IRIS_313-11679	XI-3
IRIS_313-11680	XI-3
IRIS_313-11681	XI-3
IRIS_313-11682	XI-3
IRIS_313-11683	XI-3
IRIS_313-11684	XI-3
IRIS_313-11685	XI-3
IRIS_313-11686	XI-3
IRIS_313-11687	XI-3
IRIS_313-11688	XI-3
IRIS_313-11689	GJ-tmp
IRIS_313-11690	admix
IRIS_313-11691	GJ-sbtrp
IRIS_313-11692	XI-1A
IRIS_313-11693	XI-adm
IRIS_313-11694	XI-adm
IRIS_313-11695	XI-1A
IRIS_313-11698	cB (Bas)
IRIS_313-11700	XI-3
IRIS_313-11702	GJ-tmp
IRIS_313-11704	XI-3
IRIS_313-11705	XI-3
IRIS_313-11706	XI-3
IRIS_313-11707	XI-3
IRIS_313-11708	XI-3
IRIS_313-11709	XI-3
IRIS_313-11710	XI-3
IRIS_313-11711	XI-3
IRIS_313-11712	cA (Aus)
IRIS_313-11713	XI-3
IRIS_313-11714	XI-adm
IRIS_313-11716	XI-3
IRIS_313-11717	XI-adm
IRIS_313-11719	XI-3
IRIS_313-11720	XI-3
IRIS_313-11721	XI-3
IRIS_313-11722	XI-adm
IRIS_313-11723	XI-2
IRIS_313-11724	XI-3
IRIS_313-11725	GJ-tmp
IRIS_313-11726	XI-1A
IRIS_313-11727	XI-1A
IRIS_313-11728	XI-3
IRIS_313-11729	XI-adm
IRIS_313-11730	XI-adm
IRIS_313-11731	XI-adm
IRIS_313-11732	XI-1A
IRIS_313-11733	XI-1A
IRIS_313-11734	XI-1A
IRIS_313-11735	XI-adm
IRIS_313-11736	GJ-trp
IRIS_313-11737	cA (Aus)
IRIS_313-11738	XI-2
IRIS_313-11739	GJ-trp
IRIS_313-11740	XI-adm
IRIS_313-11741	XI-2
IRIS_313-11742	cA (Aus)
IRIS_313-11743	cB (Bas)
IRIS_313-11744	XI-adm
IRIS_313-11745	XI-1A
IRIS_313-11746	XI-1A
IRIS_313-11747	XI-adm
IRIS_313-11748	XI-adm
IRIS_313-11750	XI-adm
IRIS_313-11751	XI-adm
IRIS_313-11752	XI-1A
IRIS_313-11753	XI-1A
IRIS_313-11754	admix
IRIS_313-11755	GJ-trp
IRIS_313-11756	GJ-trp
IRIS_313-11757	XI-3
IRIS_313-11758	XI-2
IRIS_313-11759	GJ-trp
IRIS_313-11760	XI-2
IRIS_313-11761	XI-2
IRIS_313-11762	XI-2
IRIS_313-11763	XI-adm
IRIS_313-11764	XI-3
IRIS_313-11765	cB (Bas)
IRIS_313-11766	admix
IRIS_313-11767	admix
IRIS_313-11772	XI-2
IRIS_313-11773	XI-3
IRIS_313-11779	XI-3
IRIS_313-11780	XI-3
IRIS_313-11782	XI-2
IRIS_313-11783	XI-adm
IRIS_313-11784	XI-1B
IRIS_313-11785	XI-3
IRIS_313-11786	XI-3
IRIS_313-11787	XI-2
IRIS_313-11788	GJ-adm
IRIS_313-11789	XI-2
IRIS_313-11790	GJ-trp
IRIS_313-11791	XI-2
IRIS_313-11792	GJ-trp
IRIS_313-11793	XI-2
IRIS_313-11794	XI-2
IRIS_313-11795	XI-1A
IRIS_313-11796	XI-1A
IRIS_313-11797	XI-1A
IRIS_313-11798	XI-1B
IRIS_313-11799	XI-1A
IRIS_313-11800	GJ-tmp
IRIS_313-11801	XI-adm
IRIS_313-11802	XI-1A
IRIS_313-11803	GJ-tmp
IRIS_313-11804	XI-1A
IRIS_313-11805	XI-1A
IRIS_313-11806	XI-1A
IRIS_313-11807	XI-adm
IRIS_313-11808	XI-adm
IRIS_313-11809	cA (Aus)
IRIS_313-11810	XI-3
IRIS_313-11811	XI-2
IRIS_313-11812	XI-3
IRIS_313-11813	XI-3
IRIS_313-11814	XI-3
IRIS_313-11815	XI-3
IRIS_313-11816	XI-adm
IRIS_313-11817	XI-adm
IRIS_313-11818	XI-adm
IRIS_313-11819	XI-3
IRIS_313-11820	XI-3
IRIS_313-11821	XI-2
IRIS_313-11822	XI-2
IRIS_313-11823	XI-2
IRIS_313-11824	XI-2
IRIS_313-11825	cB (Bas)
IRIS_313-11826	cB (Bas)
IRIS_313-11827	XI-2
IRIS_313-11828	XI-2
IRIS_313-11829	GJ-tmp
IRIS_313-11830	XI-3
IRIS_313-11831	GJ-sbtrp
IRIS_313-11832	GJ-sbtrp
IRIS_313-11833	XI-3
IRIS_313-11834	GJ-sbtrp
IRIS_313-11835	XI-adm
IRIS_313-11836	XI-3
IRIS_313-11837	XI-3
IRIS_313-11838	XI-3
IRIS_313-11839	XI-3
IRIS_313-11840	XI-3
IRIS_313-11841	XI-3
IRIS_313-11842	XI-3
IRIS_313-11843	XI-3
IRIS_313-11844	XI-3
IRIS_313-11845	GJ-sbtrp
IRIS_313-11846	GJ-sbtrp
IRIS_313-11848	XI-3
IRIS_313-11849	XI-3
IRIS_313-11850	XI-3
IRIS_313-11851	GJ-trp
IRIS_313-11852	XI-1A
IRIS_313-11853	XI-1A
IRIS_313-11854	XI-1A
IRIS_313-11855	XI-1A
IRIS_313-11856	XI-1A
IRIS_313-11857	XI-1A
IRIS_313-11858	XI-1A
IRIS_313-11859	XI-1A
IRIS_313-11860	XI-1A
IRIS_313-11861	XI-1A
IRIS_313-11862	XI-1A
IRIS_313-11863	XI-1A
IRIS_313-11865	XI-1A
IRIS_313-11866	XI-1A
IRIS_313-11867	XI-1A
IRIS_313-11868	XI-1A
IRIS_313-11869	XI-1A
IRIS_313-11870	XI-1A
IRIS_313-11871	XI-1A
IRIS_313-11872	XI-1A
IRIS_313-11875	GJ-tmp
IRIS_313-11876	XI-1A
IRIS_313-11877	XI-1A
IRIS_313-11878	XI-1A
IRIS_313-11881	XI-1A
IRIS_313-11882	XI-1A
IRIS_313-11884	XI-1A
IRIS_313-11885	XI-1A
IRIS_313-11886	XI-1B
IRIS_313-11887	XI-1B
IRIS_313-11888	cA (Aus)
IRIS_313-11889	XI-adm
IRIS_313-11890	GJ-tmp
IRIS_313-11892	GJ-sbtrp
IRIS_313-11893	XI-adm
IRIS_313-11894	XI-adm
IRIS_313-11895	XI-3
IRIS_313-11896	XI-3
IRIS_313-11897	GJ-sbtrp
IRIS_313-11898	XI-3
IRIS_313-11899	XI-adm
IRIS_313-11900	GJ-sbtrp
IRIS_313-11901	XI-3
IRIS_313-11902	XI-3
IRIS_313-11903	GJ-trp
IRIS_313-11904	XI-3
IRIS_313-11905	XI-3
IRIS_313-11906	GJ-trp
IRIS_313-11907	GJ-trp
IRIS_313-11908	GJ-tmp
IRIS_313-11909	XI-1A
IRIS_313-11910	XI-adm
IRIS_313-11911	XI-1A
IRIS_313-11912	XI-3
IRIS_313-11913	GJ-trp
IRIS_313-11914	XI-2
IRIS_313-11915	GJ-trp
IRIS_313-11916	XI-2
IRIS_313-11917	cA (Aus)
IRIS_313-11918	XI-2
IRIS_313-11919	XI-2
IRIS_313-11920	XI-adm
IRIS_313-11921	XI-3
IRIS_313-11922	GJ-sbtrp
IRIS_313-11923	GJ-sbtrp
IRIS_313-11924	GJ-sbtrp
IRIS_313-11925	XI-3
[truncated: 1,024 more rows]

## Sheet: Supplemental Table S1
Rank	Greedy ranked samples	Greedy fraction SVs covered	topN ranked samples	topN fraction SVs covered	ILP fraction SVs covered		Greedy ranked populations	Greedy ranked superpopulations	topN ranked populations	topN ranked superpopulations
1	HG02107	0.069558	HG02107	0.069558			ACB	AFR	ACB	AFR
2	NA19920	0.102826	NA19920	0.102388			ASW	AFR	ASW	AFR
3	HG01889	0.12411	HG01889	0.124212			ACB	AFR	ACB	AFR
4	NA06984	0.140649	HG02281	0.140474			CEU	EUR	ACB	AFR
5	HG03054	0.15513	HG02938	0.152955	0.15513		MSL	AFR	ESN	AFR
6	NA19917	0.1671	HG03520	0.16237	0.1678		ASW	AFR	ESN	AFR
7	HG02010	0.177873	HG01890	0.172136			ACB	AFR	ACB	AFR
8	NA19072	0.187318	HG02537	0.180311			JPT	EAS	ACB	AFR
9	HG02537	0.196091	HG03054	0.188237			ACB	AFR	MSL	AFR
10	NA19443	0.204265	HG03127	0.19466	0.204265		LWK	AFR	ESN	AFR
11	HG02283	0.211506	HG02009	0.200499			ACB	AFR	ACB	AFR
12	NA19475	0.218294	NA18856	0.206236	0.218294		LWK	AFR	YRI	AFR
13	NA18988	0.224644	NA19475	0.211652			JPT	EAS	LWK	AFR
14	HG02882	0.230585	NA19204	0.21625			GWD	AFR	YRI	AFR
15	NA18915	0.236103	HG02283	0.220104	0.236293		YRI	AFR	ACB	AFR
16	HG02554	0.241271	NA18915	0.224717	0.241694		ACB	AFR	YRI	AFR
17	NA19025	0.246175	NA18868	0.228206			LWK	AFR	YRI	AFR
18	HG03060	0.250715	HG02332	0.231797			MSL	AFR	ACB	AFR
19	HG03965	0.254963	NA18878	0.234804			ITU	SAS	YRI	AFR
20	HG03112	0.259138	NA19099	0.238117	0.259416		ESN	AFR	YRI	AFR
21	NA19332	0.263167	HG02554	0.240964			LWK	AFR	ACB	AFR
22	NA12717	0.267021	HG03382	0.244263			CEU	EUR	MSL	AFR
23	NA19355	0.270816	NA18877	0.247183			LWK	AFR	YRI	AFR
24	NA19011	0.274437	HG03202	0.249766			JPT	EAS	ESN	AFR
25	HG03433	0.278013	HG01241	0.252423			MSL	AFR	PUR	AMR
26	HG00306	0.2814	HG02922	0.254627			FIN	EUR	ESN	AFR
27	HG03079	0.284699	HG02881	0.257883			MSL	AFR	GWD	AFR
28	HG01956	0.287881	HG02282	0.260919			ACB	AFR	ACB	AFR
29	HG04206	0.29099	HG01882	0.263182			ITU	SAS	ACB	AFR
30	HG02623	0.294056	NA19439	0.264875	0.294085		GWD	AFR	LWK	AFR
31	NA19042	0.297048	NA18508	0.268043			LWK	AFR	YRI	AFR
32	HG03237	0.299953	HG02611	0.269663			PJL	SAS	GWD	AFR
33	HG03048	0.302698	HG03391	0.272261			GWD	AFR	MSL	AFR
34	HG01464	0.305354	HG03105	0.273721			CLM	AMR	ESN	AFR
35	HG03303	0.307967	NA18907	0.275648			ESN	AFR	YRI	AFR
36	HG00732	0.310522	HG02095	0.277546			PUR	AMR	ACB	AFR
37	NA19440	0.312945	HG03077	0.279663			LWK	AFR	MSL	AFR
38	HG03127	0.315354	HG03521	0.283458			ESN	AFR	ESN	AFR
39	HG00593	0.317689	HG02642	0.28483			CHS	EAS	GWD	AFR
40	NA20767	0.320011	HG03298	0.287677	0.320011		TSI	EUR	ESN	AFR
41	HG03028	0.322288	NA19900	0.290479			GWD	AFR	ASW	AFR
42	NA19320	0.324536	NA18873	0.291954			LWK	AFR	YRI	AFR
43	HG02410	0.32674	NA18505	0.293122			CDX	EAS	YRI	AFR
44	HG03452	0.328901	HG02703	0.295005			MSL	AFR	GWD	AFR
45	HG04229	0.331061	NA19257	0.296786			STU	SAS	YRI	AFR
46	HG02009	0.333148	HG02635	0.298085			ACB	AFR	GWD	AFR
47	NA19041	0.335236	HG03265	0.299515			LWK	AFR	ESN	AFR
48	HG03064	0.337221	HG02010	0.301179			MSL	AFR	ACB	AFR
49	HG04180	0.339177	NA18908	0.302479			BEB	SAS	YRI	AFR
50	HG02095	0.341119	NA19225	0.303924	0.341119		ACB	AFR	YRI	AFR
51	NA19439	0.343016	HG02645	0.305573			LWK	AFR	GWD	AFR
52	NA20894	0.344914	HG02882	0.307106			GIH	SAS	GWD	AFR
53	HG01872	0.346797	NA19190	0.309033			KHV	EAS	YRI	AFR
54	HG03063	0.348637	HG03028	0.310639			MSL	AFR	GWD	AFR
55	NA19428	0.350476	NA18523	0.312011			LWK	AFR	YRI	AFR
56	HG00182	0.352286	NA19256	0.313223			FIN	EUR	YRI	AFR
57	NA20320	0.354096	HG03060	0.314405			ASW	AFR	MSL	AFR
58	HG04195	0.355877	HG03073	0.315587			BEB	SAS	MSL	AFR
59	NA18747	0.357614	HG02549	0.316682			CHB	EAS	ACB	AFR
60	NA19351	0.359337	HG02716	0.317806	0.359424		LWK	AFR	GWD	AFR
61	HG04200	0.361015	HG02429	0.318697			ITU	SAS	ACB	AFR
62	HG01284	0.36268	HG02982	0.319646			CLM	AMR	GWD	AFR
63	HG02419	0.364344	HG02760	0.32058			ACB	AFR	GWD	AFR
64	HG02728	0.365979	HG03132	0.321952			PJL	SAS	ESN	AFR
65	NA18523	0.367614	HG02941	0.323237			YRI	AFR	ESN	AFR
66	NA19024	0.369249	HG03303	0.324346			LWK	AFR	ESN	AFR
67	NA21088	0.370854	NA19834	0.325207			GIH	SAS	ASW	AFR
68	HG02238	0.372445	HG02568	0.326419			IBS	EUR	GWD	AFR
69	HG01890	0.374037	HG03136	0.327353			ACB	AFR	ESN	AFR
70	NA18566	0.375599	NA19210	0.328287	0.375744		CHB	EAS	YRI	AFR
71	HG02879	0.37716	NA19042	0.329411			GWD	AFR	LWK	AFR
72	HG01985	0.378708	HG02574	0.3302			ACB	AFR	GWD	AFR
73	HG02881	0.380241	HG02722	0.33109			GWD	AFR	GWD	AFR
74	HG03854	0.381773	NA19184	0.332039			STU	SAS	YRI	AFR
75	HG04100	0.383262	HG02721	0.333572			STU	SAS	GWD	AFR
76	HG03461	0.384751	HG02419	0.334667			MSL	AFR	ACB	AFR
77	NA19717	0.386211	NA19835	0.335513			MXL	AMR	ASW	AFR
78	NA20318	0.387656	HG03121	0.337893			ASW	AFR	ESN	AFR
79	HG02375	0.389101	NA18502	0.338812			CDX	EAS	YRI	AFR
80	HG02568	0.390532	NA18517	0.339893	0.391291		GWD	AFR	YRI	AFR
81	HG01133	0.391933	HG03052	0.340768			CLM	AMR	MSL	AFR
82	HG02611	0.393335	NA19114	0.341513			GWD	AFR	YRI	AFR
83	HG00556	0.394707	NA19107	0.342272			CHS	EAS	YRI	AFR
84	HG00734	0.396064	NA19332	0.343133			PUR	AMR	LWK	AFR
85	HG03082	0.397422	HG02943	0.344009			MSL	AFR	ESN	AFR
86	HG03709	0.398765	HG03097	0.345352			PJL	SAS	MSL	AFR
87	NA07357	0.400093	NA19108	0.346213			CEU	EUR	YRI	AFR
88	NA19007	0.401407	HG03175	0.346739			JPT	EAS	ESN	AFR
89	HG03166	0.402706	HG02634	0.3476			ESN	AFR	GWD	AFR
90	HG00478	0.403991	NA19437	0.349031	0.404152		CHS	EAS	LWK	AFR
91	HG03644	0.405276	NA19025	0.34979			STU	SAS	LWK	AFR
92	NA19393	0.40656	HG02879	0.350476			LWK	AFR	GWD	AFR
93	HG02073	0.40783	NA18876	0.35179			KHV	EAS	YRI	AFR
94	HG00739	0.409086	HG02771	0.352301			PUR	AMR	GWD	AFR
95	NA18508	0.410341	HG03096	0.353439			YRI	AFR	MSL	AFR
96	NA18592	0.411596	NA18909	0.354344			CHB	EAS	YRI	AFR
97	NA19449	0.412823	HG01883	0.35503			LWK	AFR	ACB	AFR
98	HG01936	0.414034	HG02675	0.356023			PEL	AMR	GWD	AFR
99	HG02561	0.415246	HG01990	0.356767			GWD	AFR	ACB	AFR
100	HG02666	0.416457	HG03120	0.357483	0.417538		GWD	AFR	ESN	AFR
Supplemental Table S1: The ranked samples and fraction of SVs covered for the 1000 Genomes project for the greedy and topN selections. The fraction of SVs covered for the Integer Linear Programming solution for select values.

## Sheet: Supplemental Table S2
Greedy:			topN:			Total:
Number	Population		Number	Population		Number	Population
12	ACB		18	ACB		96	ACB
4	ASW		4	ASW		60	ASW
4	ESN		17	ESN		99	ESN
10	GWD		19	GWD		113	GWD
15	LWK		6	LWK		99	LWK
9	MSL		9	MSL		81	MSL
3	YRI		26	YRI		107	YRI
3	CLM		0	CLM		94	CLM
1	MXL		0	MXL		64	MXL
1	PEL		0	PEL		79	PEL
3	PUR		1	PUR		104	PUR
2	CDX		0	CDX		93	CDX
3	CHB		0	CHB		103	CHB
3	CHS		0	CHS		105	CHS
4	JPT		0	JPT		104	JPT
2	KHV		0	KHV		99	KHV
3	CEU		0	CEU		98	CEU
2	FIN		0	FIN		99	FIN
0	GBR		0	GBR		89	GBR
1	IBS		0	IBS		107	IBS
1	TSI		0	TSI		107	TSI
2	BEB		0	BEB		84	BEB
2	GIH		0	GIH		103	GIH
3	ITU		0	ITU		99	ITU
3	PJL		0	PJL		93	PJL
4	STU		0	STU		99	STU
57	AFR		99	AFR		655	AFR
8	AMR		1	AMR		341	AMR
14	EAS		0	EAS		504	EAS
7	EUR		0	EUR		500	EUR
14	SAS		0	SAS		478	SAS
Supplemental Table S2: Distribution of samples across populations for the 1000 Genomes Project for the greedy selection, the topN selection, and the whole dataset.

## Sheet: Supplemental Table S3
Rank	Greedy ranked samples	Greedy fraction SVs covered	topN ranked samples	topN fraction SVs covered		Greedy ranked populations	topN ranked populations
1	IRIS_313-11098	0.065063	IRIS_313-11098	0.065063		XI-3	XI-3
2	IRIS_313-11052	0.094236	IRIS_313-11671	0.092654		cA (Aus)	XI-2
3	IRIS_313-11671	0.114813	IRIS_313-11646	0.107375		XI-2	XI-2
4	IRIS_313-11681	0.130014	IRIS_313-11812	0.119488		XI-3	XI-3
5	IRIS_313-11737	0.14283	IRIS_313-11681	0.132		cA (Aus)	XI-3
6	IRIS_313-8326	0.154832	IRIS_313-11802	0.142418		cB (Bas)	XI-1A
7	IRIS_313-10392	0.16526	IRIS_313-11710	0.149442		XI-1B	XI-3
8	IRIS_313-11791	0.175025	IRIS_313-11645	0.15763		XI-2	XI-2
9	IRIS_313-11802	0.18374	IRIS_313-11723	0.163854		XI-1A	XI-2
10	IRIS_313-11277	0.192013	IRIS_313-11796	0.170001		cA (Aus)	XI-1A
11	IRIS_313-10918	0.199441	IRIS_313-11635	0.174935		GJ-trp	XI-3
12	IRIS_313-10718	0.206249	IRIS_313-11657	0.179647		cA (Aus)	XI-2
13	IRIS_313-11710	0.212936	IRIS_313-11683	0.184253		XI-3	XI-3
14	IRIS_313-11289	0.219287	IRIS_313-11643	0.191432		cB (Bas)	XI-1B
15	CX225	0.225394	IRIS_313-11687	0.195279		XI-1B	XI-3
16	IRIS_313-11242	0.231128	IRIS_313-11686	0.198749		XI-2	XI-3
17	IRIS_313-11924	0.236584	IRIS_313-11819	0.202616		GJ-sbtrp	XI-3
18	IRIS_313-11704	0.24195	IRIS_313-8493	0.206642		XI-3	XI-3
19	IRIS_313-11057	0.247223	IRIS_313-11821	0.210685		cA (Aus)	XI-2
20	IRIS_313-11484	0.25215	IRIS_313-11704	0.215276		cA (Aus)	XI-3
21	IRIS_313-11796	0.257003	IRIS_313-11665	0.218446		XI-1A	XI-1A
22	IRIS_313-10892	0.261592	IRIS_313-11761	0.222484		cA (Aus)	XI-2
23	IRIS_313-11645	0.266015	IRIS_313-11794	0.225499		XI-2	XI-2
24	IRIS_313-11716	0.270215	IRIS_313-11824	0.228292		XI-3	XI-2
25	IRIS_313-11413	0.274353	IRIS_313-11700	0.230864		cA (Aus)	XI-3
26	IRIS_313-11723	0.278385	IRIS_313-11668	0.233434		XI-2	XI-1A
27	IRIS_313-7689	0.282337	IRIS_313-11242	0.239099		XI-1B	XI-2
28	IRIS_313-9449	0.286142	IRIS_313-8391	0.241936		cA (Aus)	XI-2
29	IRIS_313-11683	0.289862	IRIS_313-11745	0.244829		XI-3	XI-1A
30	CX367	0.29353	IRIS_313-11707	0.247559		GJ-trp	XI-3
31	IRIS_313-11113	0.297169	IRIS_313-11692	0.250098		XI-2	XI-1A
32	IRIS_313-11095	0.300714	IRIS_313-11815	0.252188		XI-3	XI-3
33	CX358	0.304203	IRIS_313-8948	0.254747		XI-1B	XI-3
34	IRIS_313-11604	0.307627	IRIS_313-11746	0.256867		cA (Aus)	XI-1A
35	CX72	0.310944	IRIS_313-11720	0.259125		cB (Bas)	XI-3
36	IRIS_313-8493	0.314202	IRIS_313-11089	0.261911		XI-3	XI-3
37	B212	0.317418	IRIS_313-11813	0.264021		GJ-tmp	XI-3
38	IRIS_313-10863	0.320564	IRIS_313-11814	0.265816		XI-2	XI-3
39	B221	0.323658	IRIS_313-11791	0.271634		XI-1A	XI-2
40	IRIS_313-11687	0.326687	IRIS_313-11039	0.274117		XI-3	XI-1A
41	IRIS_313-10598	0.32968	IRIS_313-10863	0.276943		cA (Aus)	XI-2
42	CX99	0.332642	IRIS_313-11823	0.278956		XI-2	XI-2
43	IRIS_313-11790	0.335567	IRIS_313-11811	0.28104		GJ-trp	XI-2
44	CX270	0.338426	IRIS_313-10986	0.283521		XI-1A	XI-2
45	IRIS_313-10020	0.341257	IRIS_313-11052	0.291214		cA (Aus)	cA (Aus)
46	IRIS_313-12044	0.344073	IRIS_313-11724	0.293507		XI-3	XI-3
47	IRIS_313-8864	0.346796	IRIS_313-11805	0.294867		cA (Aus)	XI-1A
48	IRIS_313-11761	0.349477	IRIS_313-11113	0.297681		XI-2	XI-2
49	IRIS_313-10851	0.352141	IRIS_313-11797	0.29918		cB (Bas)	XI-1A
50	IRIS_313-10706	0.354758	IRIS_313-11737	0.304737		XI-3	cA (Aus)
51	IRIS_313-11643	0.357325	IRIS_313-11728	0.306159		XI-1B	XI-3
52	IRIS_313-11027	0.359859	IRIS_313-11709	0.307651		cA (Aus)	XI-3
53	CX106	0.362377	IRIS_313-11684	0.308887		GJ-trp	XI-3
54	IRIS_313-11707	0.364867	IRIS_313-11734	0.310844		XI-3	XI-1A
55	IRIS_313-11646	0.367315	IRIS_313-11277	0.315725		XI-2	cA (Aus)
56	IRIS_313-11734	0.369729	CX97	0.31725		XI-1A	XI-1B
57	B094	0.372088	IRIS_313-11786	0.318238		XI-1A	XI-3
58	IRIS_313-11089	0.374419	IRIS_313-10975	0.320145		XI-3	XI-2
59	B012	0.37672	IRIS_313-11674	0.321364		XI-2	XI-3
60	IRIS_313-11930	0.378972	IRIS_313-11644	0.32434		XI-1B	XI-2
61	IRIS_313-8407	0.381206	IRIS_313-11708	0.325344		XI-3	XI-3
62	IRIS_313-11812	0.383419	IRIS_313-11711	0.32654		XI-3	XI-3
63	IRIS_313-11112	0.385616	IRIS_313-11820	0.328185		cA (Aus)	XI-3
64	IRIS_313-10870	0.387788	IRIS_313-11685	0.32925		GJ-sbtrp	XI-3
65	IRIS_313-11625	0.389955	IRIS_313-11719	0.330078		cB (Bas)	XI-3
66	IRIS_313-10592	0.392093	IRIS_313-11809	0.333479		cA (Aus)	cA (Aus)
67	IRIS_313-11635	0.394201	IRIS_313-11789	0.334448		XI-3	XI-2
68	IRIS_313-11724	0.396283	IRIS_313-9148	0.336435		XI-3	XI-2
69	IRIS_313-11809	0.398347	IRIS_313-11738	0.337407		cA (Aus)	XI-2
70	CX383	0.400387	IRIS_313-9294	0.33825		GJ-tmp	XI-2
71	B214	0.402419	IRIS_313-11727	0.338952		XI-1B	XI-1A
72	IRIS_313-9039	0.404431	IRIS_313-11762	0.340249		XI-2	XI-2
73	IRIS_313-11039	0.406417	IRIS_313-11057	0.343842		XI-1A	cA (Aus)
74	IRIS_313-11360	0.408376	IRIS_313-11721	0.344991		cB (Bas)	XI-3
75	CX381	0.410325	IRIS_313-8864	0.347794		XI-1B	cA (Aus)
76	IRIS_313-11657	0.41226	IRIS_313-11764	0.348878		XI-2	XI-3
77	IRIS_313-11298	0.41418	IRIS_313-12058	0.349984		cA (Aus)	XI-3
78	IRIS_313-11079	0.416077	IRIS_313-8305	0.35075		XI-3	XI-2
79	IRIS_313-11102	0.417959	IRIS_313-11804	0.351614		GJ-trp	XI-1A
80	IRIS_313-11700	0.419789	IRIS_313-11810	0.35225		XI-3	XI-3
81	IRIS_313-11655	0.421614	IRIS_313-11752	0.352938		GJ-tmp	XI-1A
82	IRIS_313-11936	0.423418	IRIS_313-11648	0.354016		XI-3	XI-2
83	IRIS_313-11691	0.425214	IRIS_313-8407	0.356052		GJ-sbtrp	XI-3
84	IRIS_313-9112	0.427003	IRIS_313-11716	0.358422		XI-3	XI-3
85	IRIS_313-11644	0.428762	IRIS_313-9020	0.359122		XI-2	XI-3
86	IRIS_313-11745	0.430507	IRIS_313-11760	0.360024		XI-1A	XI-2
87	IRIS_313-11047	0.432249	IRIS_313-11453	0.361251		cA (Aus)	XI-2
88	CX141	0.433963	B264	0.362559		XI-3	XI-1A
89	IRIS_313-11963	0.435666	IRIS_313-11758	0.363515		cA (Aus)	XI-2
90	IRIS_313-12094	0.437366	IRIS_313-11799	0.364728		cB (Bas)	XI-1A
91	IRIS_313-11361	0.439053	IRIS_313-11298	0.367266		XI-2	cA (Aus)
92	IRIS_313-11603	0.440725	IRIS_313-11705	0.367877		cA (Aus)	XI-3
93	IRIS_313-11720	0.442391	IRIS_313-11118	0.368791		XI-3	XI-3
94	IRIS_313-10986	0.444028	B214	0.371134		XI-2	XI-1B
95	IRIS_313-11274	0.445645	IRIS_313-8293	0.372493		cA (Aus)	XI-3
96	IRIS_313-8948	0.447258	IRIS_313-11677	0.373839		XI-3	XI-3
97	CX104	0.448857	IRIS_313-9112	0.375585		cB (Bas)	XI-3
98	IRIS_313-11310	0.450453	IRIS_313-11798	0.376541		XI-2	XI-1B
99	B149	0.452045	IRIS_313-11642	0.377319		XI-1A	XI-2
100	IRIS_313-10602	0.453624	IRIS_313-11822	0.377859		cA (Aus)	XI-2
Supplemental Table S3: The ranked samples and fraction of SVs covered for the 3K Rice Genomes project for the greedy and topN selections.

## Sheet: Supplemental Table S4
Greedy:			topN:			Total:
Number	Population		Number	Population		Number	Population
23	cA (Aus)		7	cA (Aus)		201	cA (Aus)
8	cB (Bas)		0	cB (Bas)		76	cB (Bas)
3	GJ-sbtrp		0	GJ-sbtrp		113	GJ-sbtrp
3	GJ-tmp		0	GJ-tmp		287	GJ-tmp
5	GJ-trp		0	GJ-trp		372	GJ-trp
9	XI-1A		16	XI-1A		209	XI-1A
8	XI-1B		4	XI-1B		205	XI-1B
17	XI-2		31	XI-2		285	XI-2
24	XI-3		42	XI-3		475	XI-3
Supplemental Table S4: Distribution of samples across populations for the 3K Rice Genomes project for the greedy selection, the topN selection, and the whole dataset.

## Sheet: Supplemental Table S5
	# True SVs Captured	alpha	beta	gamma
0% AF, 0% FDR (original)	26811	3908	-0.90707	21
Private, 25% FDR	26773	3906	-0.90465	29
1% AF, 1% FDR	26811	3907	-0.90283	23
1% AF, 5% FDR	26764	3880	-0.88046	32
Supplemental Table S5: Robustness of power-law curves to false positive variant calls. We spiked in false positive SVs into the 1000 Genomes Project data at the given allele frequency (AF) and false discovery rate (FDR) values. For this data, 1% FDR corresponds to 670 SVs, 5% FDR corresponds to 3488 SVs, and 25% FDR corresponds to 22085 SVs. Additionally, private means that only one random sample…

## Sheet: Supplemental Table S6
Superpopulation	Population	Alpha (SNV)	Beta (SNV)	Gamma (SNV)	Alpha (SV)	Beta (SV)	Gamma (SV)
AFR	ACB	4431469	-1.0089	19561	4122	-0.9827	0
AFR	ASW	4487205	-1.0427	38613	4051	-0.9876	0
AFR	ESN	4518985	-1.0467	8612	3782	-0.9833	0
AFR	GWD	4458549	-1.0328	14209	3962	-0.9999	0
AFR	LWK	4387817	-0.984	4582	4011	-0.9921	0
AFR	MSL	4555835	-1.0245	10387	4016	-1.0014	0
AFR	YRI	4493521	-1.0399	9265	4017	-1.0108	0
AMR	CLM	4110011	-1.1191	13303	3286	-1.0091	0
AMR	MXL	3840906	-1.2572	43894	3072	-1.0979	11
AMR	PEL	4046522	-1.2775	19400	3136	-1.1302	7
AMR	PUR	4346243	-1.1304	20353	3526	-1.0394	9
EAS	CDX	3658064	-1.3873	28833	3031	-1.2288	18
EAS	CHB	3650688	-1.3791	33981	2997	-1.2246	21
EAS	CHS	3569687	-1.3376	25754	3023	-1.2299	20
EAS	JPT	3653653	-1.3695	23560	3211	-1.2224	11
EAS	KHV	3659649	-1.3567	33262	2992	-1.2151	22
EUR	CEU	3694341	-1.2996	28041	3192	-1.1605	15
EUR	FIN	3722270	-1.3008	12371	3052	-1.1442	3
EUR	GBR	3720647	-1.3156	25228	3136	-1.1928	15
EUR	IBS	3653364	-1.2357	29423	3011	-1.1191	19
EUR	TSI	3671002	-1.2862	33337	3023	-1.1291	16
SAS	BEB	3788382	-1.2908	44432	3164	-1.1518	19
SAS	GIH	3646680	-1.2219	20547	3004	-1.0919	6
SAS	ITU	3706962	-1.2478	31643	3082	-1.1094	10
SAS	PJL	3724131	-1.2566	35451	3102	-1.1102	10
SAS	STU	3699909	-1.2461	32295	3027	-1.095	10
Supplemental Table S6: Summary of power-law parameters for the 26 subpopulations in the 1000 Genomes Project as calculated from the best fit power-law models.

## Sheet: Supplemental Table S7
Superpopulation	Population	Watterson’s Theta (SNV)	Tajima’s D (SNV)	Watterson’s Theta (SV)	Tajima’s D (SV)
AFR	ACB	0.001329	-0.6636	1.2e-06	-0.8845
AFR	ASW	0.001291	-0.6302	1.147e-06	-0.9396
AFR	ESN	0.001207	-0.4211	1.083e-06	-0.6441
AFR	GWD	0.001263	-0.5415	1.119e-06	-0.6891
AFR	LWK	0.001299	-0.6088	1.141e-06	-0.8547
AFR	MSL	0.001265	-0.5196	1.117e-06	-0.7389
AFR	YRI	0.001224	-0.4572	1.097e-06	-0.7034
AMR	CLM	0.000989	-0.4519	8.984e-07	-0.6864
AMR	MXL	0.0008626	-0.182	7.637e-07	-0.4038
AMR	PEL	0.0007941	-0.1947	7.276e-07	-0.3286
AMR	PUR	0.001064	-0.5651	9.681e-07	-0.8017
EAS	CDX	0.0006787	0.32	6.605e-07	0.137
EAS	CHB	0.0007185	0.1319	6.762e-07	-0.0262
EAS	CHS	0.000692	0.2438	6.704e-07	-0.0296
EAS	JPT	0.0006683	0.3741	6.653e-07	0.0344
EAS	KHV	0.0007319	0.0948	6.894e-07	-0.0562
EUR	CEU	0.00076	0.1657	7.445e-07	-0.1635
EUR	FIN	0.0006802	0.5331	6.717e-07	0.0137
EUR	GBR	0.0007302	0.2985	6.992e-07	-0.0552
EUR	IBS	0.0008299	-0.0885	7.781e-07	-0.3495
EUR	TSI	0.0008052	0.0002	7.565e-07	-0.1756
SAS	BEB	0.0008511	-0.0969	7.655e-07	-0.2597
SAS	GIH	0.0007862	0.1399	7.368e-07	-0.1445
SAS	ITU	0.0008286	-0.0183	7.53e-07	-0.2041
SAS	PJL	0.0008373	-0.0341	7.594e-07	-0.2338
SAS	STU	0.000833	-0.0314	7.608e-07	-0.2278
Supplemental Table S7: Summary of population diversity metrics for the 26 subpopulations in the 1000 Genomes Project as calculated by Sci-kit allel.
